# Supplementary material
Source: PubMed Central journal article supplement (PMC3351204)

**Supporting information for**  
**Rh<sub>2</sub>(S-biTISP)<sub>2</sub>-Catalyzed Asymmetric**  
**Functionalization of Indoles and Pyrroles with**  
**Vinylcarbenoids**

Yajing Lian and Huw M. L. Davies\*

Department of Chemistry, Emory University, 1515 Dickey Drive, Atlanta,  
Georgia 30322, USA

**Supporting Information**

|                                                |      |
|------------------------------------------------|------|
| Reaction Equations for Table <b>3</b>          | S-2  |
| Reaction Equations for Table <b>4</b>          | S-4  |
| Experimental Procedure                         | S-5  |
| Crystal Structure of Product <b>17</b>         | S-17 |
| <sup>1</sup> H and <sup>13</sup> C NMR Spectra | S-18 |

## Reaction Equations for Table 3:

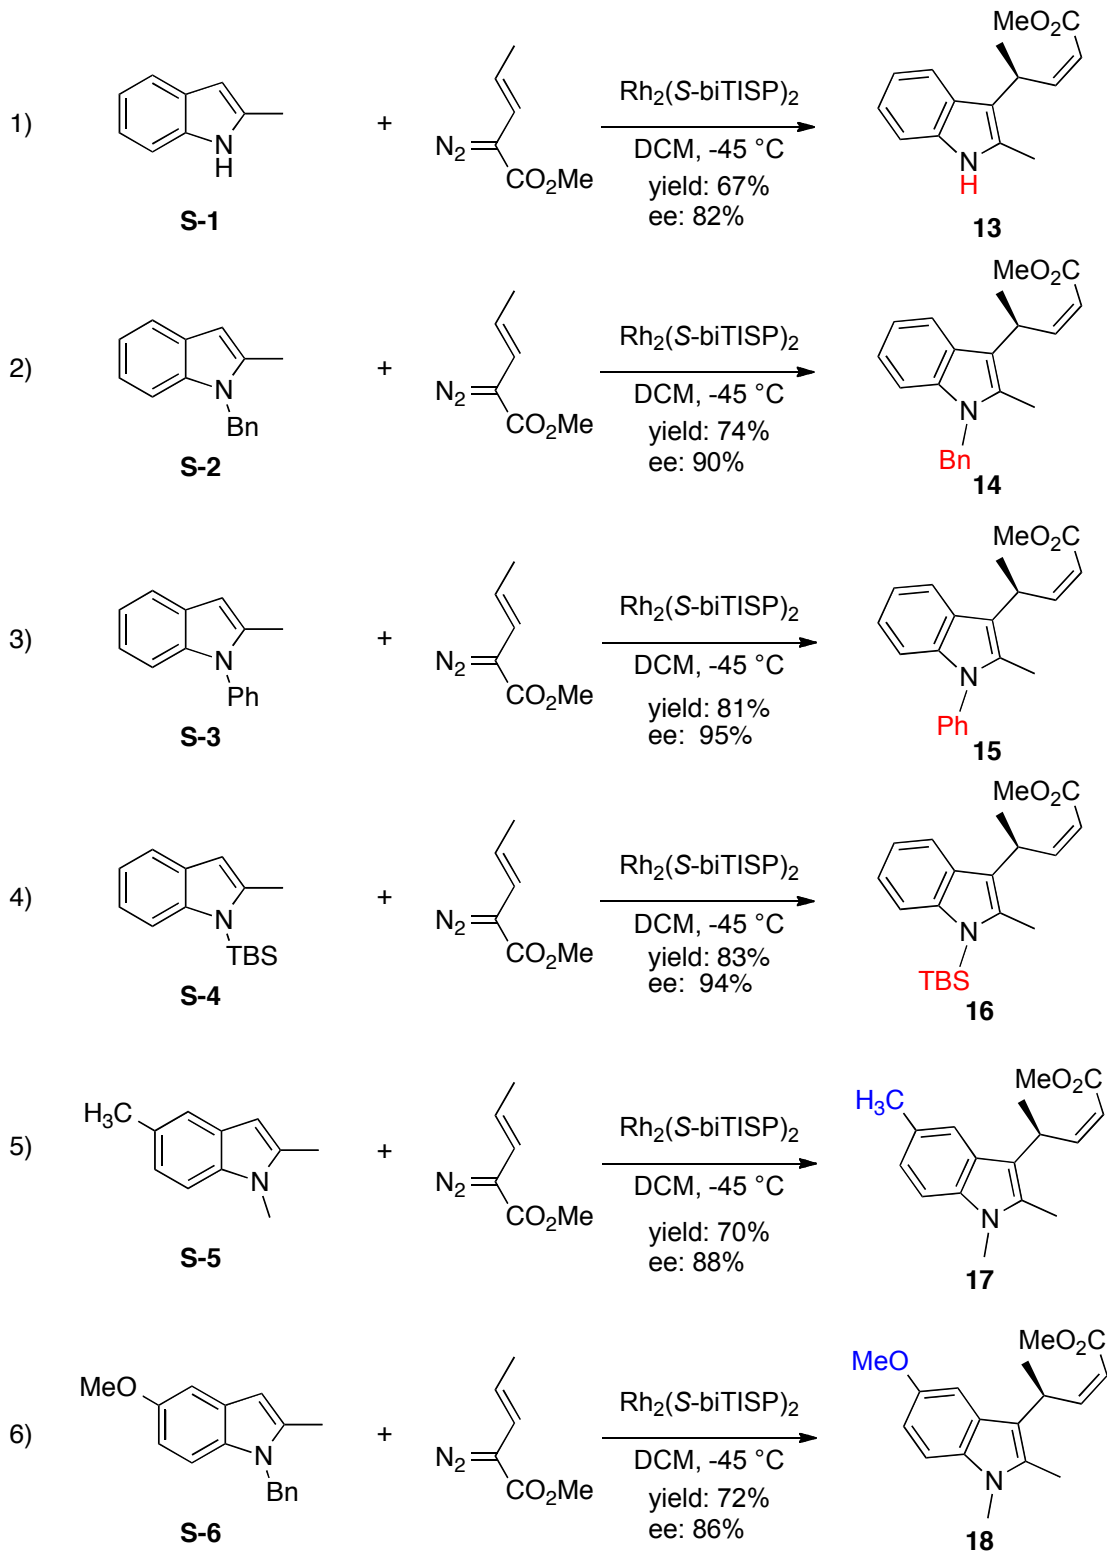

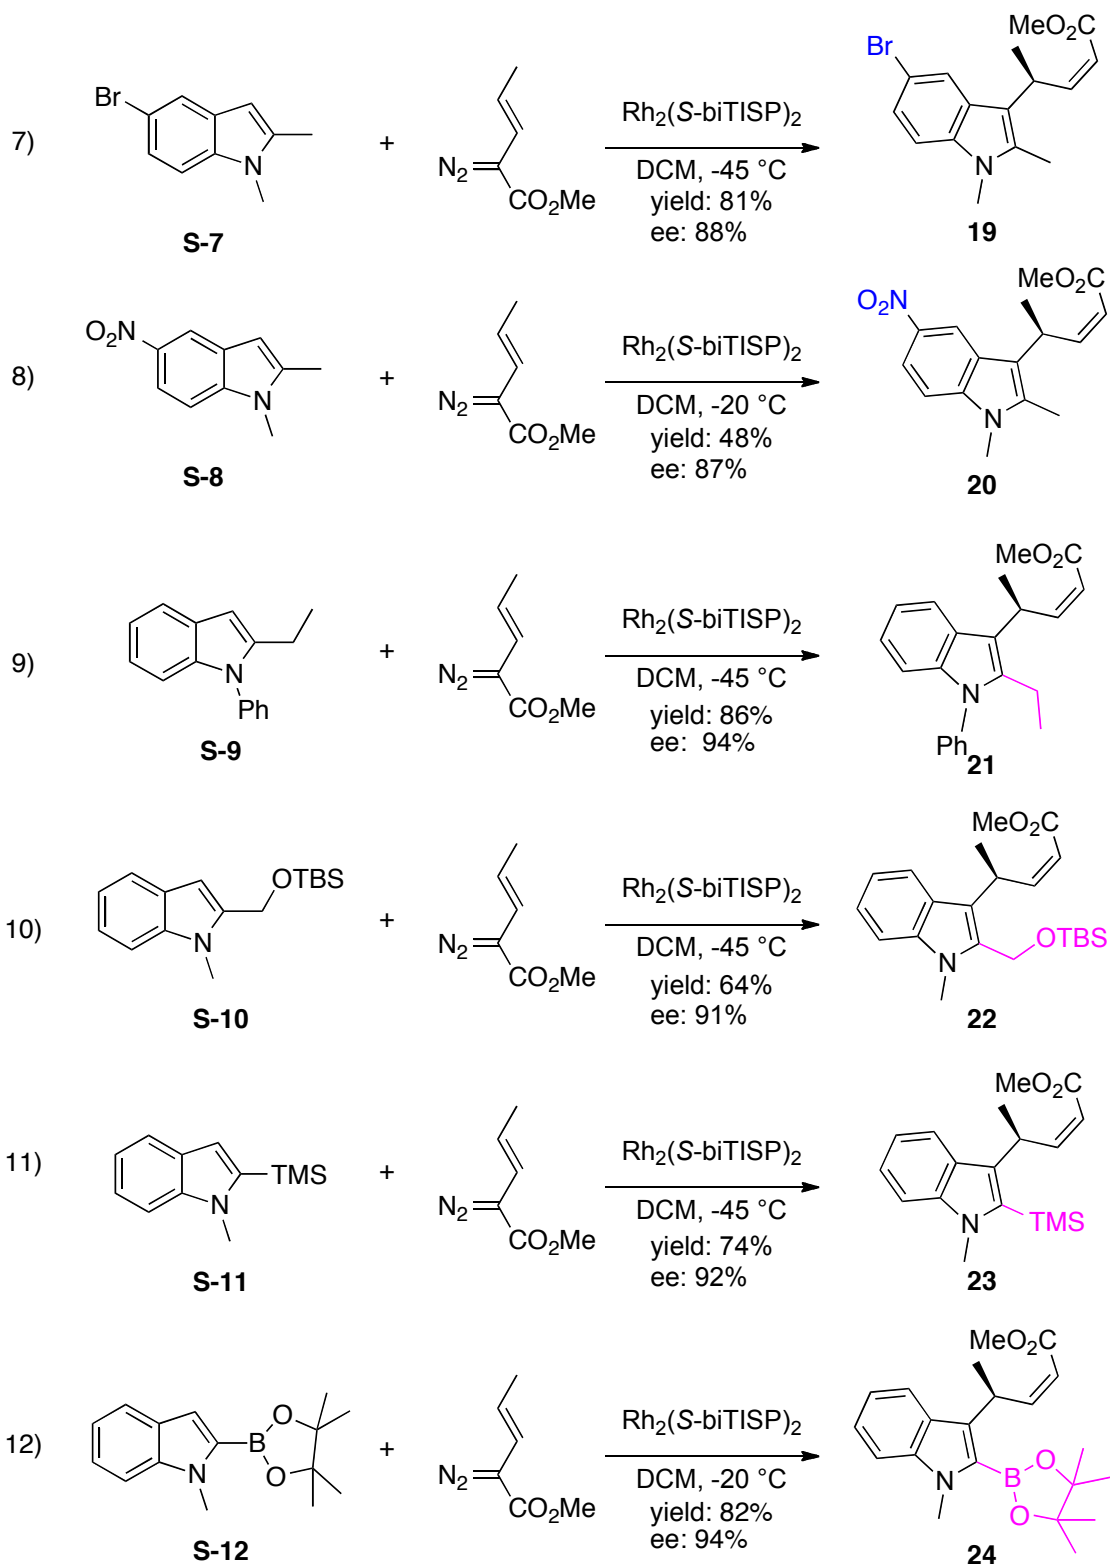

## Reaction Equations for Table 4:

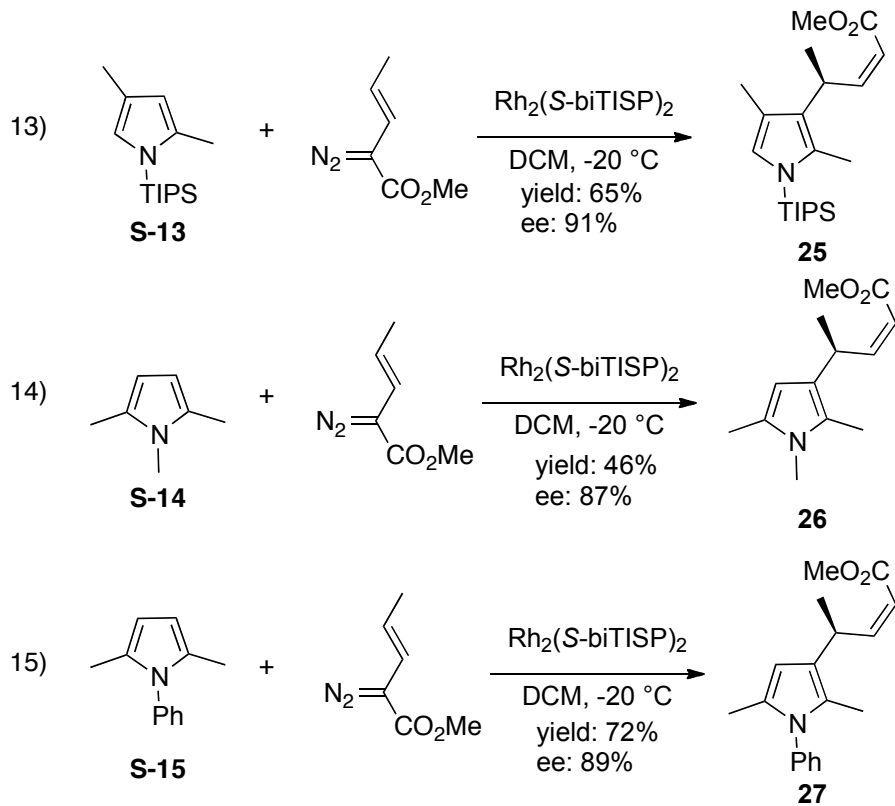

**General Methods:** All experiments were performed under anhydrous conditions in an atmosphere of argon except where stated, using flame-dried glassware. THF and methylenechloride were dried by a solvent purification system (passed through activated alumina columns). Unless otherwise noted, all other reagents were obtained from commercial sources and used as received. <sup>1</sup>H Nuclear Magnetic Resonance (NMR) spectra were recorded at 400 or 600 MHz. Data are presented as follows: chemical shift (in ppm on the  $\delta$  scale relative to  $\delta$ H 7.26 for the residual protons in CDCl<sub>3</sub>), multiplicity (s = singlet, d = doublet, t = triplet, q = quartet, m = multiplet, br = broad), coupling constant (*J*/Hz), integration. Coupling constants were taken directly from the spectra and are uncorrected. <sup>13</sup>C NMR spectra were recorded at 100 or 150 MHz, and all chemical shift values are reported in ppm on the  $\delta$  scale, with an internal reference of  $\delta$ C 77.0 for CDCl<sub>3</sub>. Mass spectral determinations were carried out by using APCI as ionization source. Melting points are uncorrected. Infrared spectral data are reported in units of cm<sup>-1</sup>. Analytical TLC was performed on silica gel plates using UV light or potassium permanganate stain if stated. Flash column chromatography was performed on silica gel 60A (230-400 mesh).

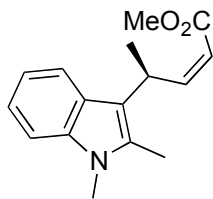

**(*S,Z*)-Methyl 4-(1,2-dimethyl-1*H*-indol-3-yl)pent-2-enoate (**6**):**

To a flame-dried 25 mL flask containing  $\text{Rh}_2(\text{S-biTISP})_2$  (5.6 mg, 0.02 equiv.) and 1,2-dimethylindole (**5**) (130.6 mg, 0.90 mmol, 6.0 equiv.) in 6 mL dried  $\text{CH}_2\text{Cl}_2$  under argon atmosphere was added a solution of fresh purified *trans*-methyl vinyldiazoacetate (**1b**) (21.0 mg, 0.15 mmol, 1.0 equiv.) in 6 mL dried  $\text{CH}_2\text{Cl}_2$  by syringe pump over 3 h at  $-45^\circ\text{C}$ . The solution was warmed up to room temperature over night. The mixture was concentrated under reduced pressure and purified by flash chromatography on silica gel (85/15 pentane/ $\text{Et}_2\text{O}$ ,  $R_f$ : 0.45) to provide the corresponding product **6** as colorless gel powder (25.5 mg, 66% yield).

Spectroscopic data on the purified products was consistent with reported value.<sup>1</sup> HPLC: (OD-H, 1% isopropanol in hexane, 0.7 mL/min) retention times of 18.5 (major) and 21.3 (minor), 89% ee;  $[\alpha]_D^{25}$  317.0 ( $c = 0.89$ ,  $\text{CHCl}_3$ ).

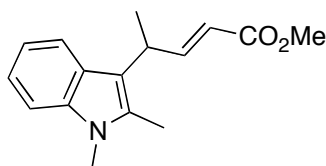

**(*E*)-methyl 4-(1,2-dimethyl-1*H*-indol-3-yl)pent-2-enoate (**11**)**

Derived from 1,2-dimethylindole (**5**) (130.6 mg, 0.90 mmol, 6.0 equiv.) and *trans*-methyl vinyldiazoacetate (**1b**) (21 mg, 0.15 mmol, 1.0 equiv.) in the presence of  $\text{Rh}_2(\text{S-DOSP})_4$  (5.6 mg, 0.02 equiv.) and purified by flash chromatography on silica gel (85/15 pentane/ $\text{Et}_2\text{O}$ ,  $R_f$ : 0.28 for product **11** and 0.33 for product **12**) to provide product **11** as a colorless viscous oil (13.1 mg, 34% yield) and product **12** as a colorless powder (12.3 mg, 32% yield).

<sup>1</sup>H NMR (400 MHz,  $\text{CDCl}_3$ ): 7.51 (d,  $J = 7.8$  Hz, 1H), 7.28 (dd,  $J = 15.9, 5.5$  Hz, 1H), 7.25 (d,  $J = 8.3$  Hz, 1H), 7.14 (t,  $J = 7.7$  Hz, 1H), 7.03 (t,  $J = 7.8$  Hz, 1H), 5.84 (dd,  $J = 1.9, 15.9$  Hz, 1H), 3.85-3.93 (m, 1H), 3.69 (s, 3H), 3.64 (s, 3H), 2.34 (s, 3H), 1.55 (d,  $J =$

<sup>1</sup> Lian, Y.; Davies, H. M. L. *Org. Lett.* **2010**, *12*, 924.

7.1 Hz, 3H);  $^{13}\text{C}$  NMR (100 MHz,  $\text{CDCl}_3$ ): 167.4, 153.3, 136.7, 132.6, 126.1, 120.6, 119.0, 118.9, 118.7, 111.8, 108.7, 51.4, 33.6, 29.5, 19.4, 10.5; IR (neat): 2921, 1718, 1471, 1408, 1272, 908, 730  $\text{cm}^{-1}$ ; HRMS (EI) calc for  $\text{C}_{16}\text{H}_{20}\text{O}_2\text{N}$  ( $\text{M}+\text{H}$ ) $^+$  258.1489 found 258.1490.

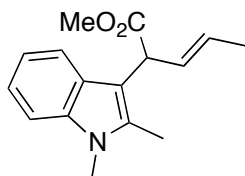

**(E)-methyl 2-(1,2-dimethyl-1H-indol-3-yl)pent-3-enoate (12):**

$^1\text{H}$  NMR (400 MHz,  $\text{CDCl}_3$ ): 7.60 (d,  $J = 7.8$  Hz, 1H), 7.24 (d,  $J = 7.4$  Hz, 1H), 7.14-7.19 (m, 1H), 7.06-7.11 (m, 1H), 6.04 (qq,  $J = 7.4, 1.6$  Hz, 1H), 5.47-5.56 (m, 1H), 4.53-4.57 (m, 1H), 3.67 (s, 3H), 3.66 (s, 3H), 2.41 (s, 3H), 1.67-1.70 (m, 3H);  $^{13}\text{C}$  NMR (100 MHz,  $\text{CDCl}_3$ ): 174.1, 136.5, 133.6, 127.8, 127.2, 126.2, 120.8, 119.1, 118.9, 108.7, 108.1, 52.0, 45.7, 29.6, 17.9, 10.6; IR (neat): 2917, 1731, 1471, 1409, 1158, 963, 738  $\text{cm}^{-1}$ ; HRMS (EI) calc for  $\text{C}_{16}\text{H}_{20}\text{O}_2\text{N}$  ( $\text{M}+\text{H}$ ) $^+$  258.1489 found 258.1490; M. P. 70-72  $^\circ\text{C}$ .

**General procedure for the reaction between indoles and methyl vinyl diazoacetate:**

To a flame-dried 25 mL flask containing  $\text{Rh}_2(\text{S-bi-TISP})_2$  (5.5 mg, 0.02 equiv.) and indoles (0.90 mmol, 6.0 equiv.) in 6 mL dried  $\text{CH}_2\text{Cl}_2$  under argon atmosphere was added a solution of fresh purified *trans*-methyl vinyl diazoacetate (**1b**) (21.0 mg, 0.15 mmol, 1.0 equiv.) in 6 mL dried  $\text{CH}_2\text{Cl}_2$  by syringe pump over 3 h at  $-45$   $^\circ\text{C}$ . The solution was warmed up to room temperature over night. The mixture was concentrated under reduced pressure and purified by flash chromatography on silica gel (pentane/ $\text{Et}_2\text{O}$ ) to provide the corresponding products as colorless oil or powder.

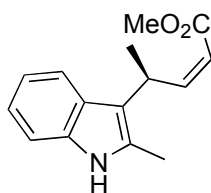

**(S,Z)-methyl 4-(2-methyl-1H-indol-3-yl)pent-2-enoate (13):**

Derived from 2-methylindole (**S-1**) (118.0 mg, 0.90 mmol, 6.0 equiv.) and *trans*-methyl vinyl diazoacetate (**1b**) (21 mg, 0.15 mmol, 1.0 equiv.), and purified by flash

chromatography on silica gel (7/3 pentane/Et<sub>2</sub>O, R<sub>f</sub>: 0.41) to provide product **13** as a colorless powder (24.6 mg, 67% yield).

Spectroscopic data on the purified products was consistent with reported value.<sup>1</sup> HPLC: (AD-H, 3% isopropanol in hexane, 0.7 mL/min) retention times of 26.4 (major) and 30.4 (minor), 82% ee;  $[\alpha]_D^{25}$  324.6 ( $c = 0.30$ , CHCl<sub>3</sub>).

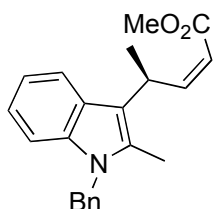

**(*S,Z*)-methyl 4-(1-benzyl-2-methyl-1*H*-indol-3-yl)pent-2-enoate (**14**):**

Derived from 1-benzyl-2-methyl-1*H*-indole (**S-2**) (199 mg, 0.90 mmol, 6.0 equiv.) and *trans*-methyl vinyldiazoacetate (**1b**) (21 mg, 0.15 mmol, 1.0 equiv.), and purified by flash chromatography on silica gel (9/1 pentane/Et<sub>2</sub>O, R<sub>f</sub>: 0.42) to provide product **14** as colorless oil (37.0 mg, 74% yield).

Spectroscopic data on the purified products was consistent with reported value.<sup>1</sup> HPLC: (AD-H, 1% isopropanol in hexane, 0.7 mL/min) retention times of 8.9 (major) and 13.1 (minor), 90% ee;  $[\alpha]_D^{25}$  305.5 ( $c = 0.73$ , CHCl<sub>3</sub>).

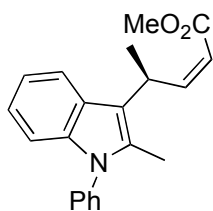

**(*S,Z*)-methyl 4-(2-methyl-1-phenyl-1*H*-indol-3-yl)pent-2-enoate (**15**):**

Derived from 1-phenyl-2-methyl-1*H*-indole (**S-3**) (187 mg, 0.90 mmol, 6.0 equiv.) and *trans*-methyl vinyldiazoacetate (**1b**) (21 mg, 0.15 mmol, 1.0 equiv.), and purified by flash chromatography on silica gel (10/1 pentane/Et<sub>2</sub>O, R<sub>f</sub>: 0.44) to provide product **15** as colorless oil (38.6 mg, 81% yield).

<sup>1</sup>H NMR (400 MHz, CDCl<sub>3</sub>): 7.72-7.76 (m, 1H), 7.49-7.55 (m, 2H), 7.41-7.47 (m, 1H), 7.31-7.34 (m, 1H), 7.05-7.14 (m, 3H), 6.84 (t,  $J = 11.0$  Hz, 1H), 5.74 (dm,  $J = 11.0$  Hz,



1H), 5.20-5.28 (m, 1H), 3.74 (s, 3H), 2.30 (s, 3H), 1.61 (d,  $J = 7.4$  Hz, 3H);  $^{13}\text{C}$  NMR (100 MHz,  $\text{CDCl}_3$ ): 166.8, 153.8, 138.0, 137.8, 133.1, 129.4, 128.3, 127.6, 126.2, 120.9, 119.4, 119.0, 116.5, 114.6, 110.3, 51.1, 30.6, 20.8, 11.3; IR (neat): 1717, 1500, 1368, 1175, 823, 739, 699  $\text{cm}^{-1}$ ; HRMS (APCI) calc for  $\text{C}_{21}\text{H}_{22}\text{O}_2\text{N}$  ( $\text{M}+\text{H}$ ) $^+$  320.1645 found 320.1649; HPLC: (OD-H, 0.5% isopropanol in hexane, 0.5 mL/min) retention times of 10.2 (major) and 10.9 (minor), 94% ee;  $[\alpha]_{\text{D}}^{25}$  246.4 ( $c = 1.22$ ,  $\text{CHCl}_3$ ).

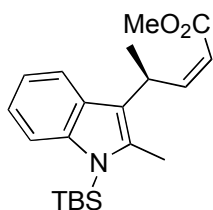

**(*S,Z*)-methyl 4-(1-(*tert*-butyldimethylsilyl)-2-methyl-1*H*-indol-3-yl)pent-2-enoate (16):**

Derived from 1-(*tert*-butyldimethylsilyl)-2-methyl-1*H*-indole (**S-4**) (221 mg, 0.90 mmol, 6.0 equiv.) and *trans*-methyl vinyl diazoacetate (**1b**) (21 mg, 0.15 mmol, 1.0 equiv.), and purified by flash chromatography on silica gel (20/1 pentane/ $\text{Et}_2\text{O}$ ,  $R_f$ : 0.38) to provide product **16** as colorless oil (44.6 mg, 83% yield).

$^1\text{H}$  NMR (400 MHz,  $\text{CDCl}_3$ ):  $\delta$  7.65-7.71 (m, 1H), 7.50-7.55 (m, 1H), 7.06-7.10 (m, 2H), 6.83 (dd,  $J = 11.3, 10.4$  Hz, 1H), 5.72 (dd,  $J = 11.3, 1.2$  Hz, 1H), 5.14-5.22 (m, 1H), 3.74 (s, 3H), 2.49 (s, 3H), 1.57 (d,  $J = 7.0$  Hz, 3H), 0.99 (s, 9H), 0.67 (s, 6H);  $^{13}\text{C}$  NMR (100 MHz,  $\text{CDCl}_3$ ):  $\delta$  166.7, 153.8, 141.9, 137.8, 129.4, 120.0, 119.0, 118.7, 117.8, 116.6, 114.4, 51.0, 30.5, 26.8, 20.6, 20.5, 14.7, 0.0; IR (neat): 2952, 2930, 1720, 1472, 1272, 1193, 1174, 1001, 821, 785, 736  $\text{cm}^{-1}$ ; HRMS (APCI) calc. for  $\text{C}_{21}\text{H}_{32}\text{O}_2\text{NSi}$  ( $\text{M}+\text{H}$ ) $^+$  358.2197 found 358.2196. HPLC: (OA-2000, hexane, 0.5 mL/min) retention times of 14.4 (major) and 15.3 (minor), 94% ee;  $[\alpha]_{\text{D}}^{25}$  247.5 ( $c = 0.82$ ,  $\text{CHCl}_3$ ).

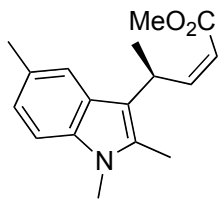

**(*S,Z*)-methyl 4-(1,2,5-trimethyl-1*H*-indol-3-yl)pent-2-enoate (**17**):**

Derived from 1,2,5-trimethyl-1*H*-indole (**S-5**) (143 mg, 0.90 mmol, 6.0 equiv.) and *trans*-methyl vinyl diazoacetate (**1b**) (21 mg, 0.15 mmol, 1.0 equiv.), and purified by flash chromatography on silica gel (85/15 pentane/Et<sub>2</sub>O, R<sub>f</sub>: 0.49) to provide product **17** as colorless oil (28.6 mg, 70% yield).

<sup>1</sup>H NMR (400 MHz, CDCl<sub>3</sub>): 7.46 (s, 1H), 7.15 (d, *J* = 8.2 Hz, 1H), 6.97 (d, *J* = 8.2 Hz, 1H), 6.80 (t, *J* = 11.4 Hz, 1H), 5.68 (d, *J* = 11.4 Hz, 1H), 5.10-5.18 (m, 1H), 3.74 (s, 3H), 3.61 (s, 3H), 2.46 (s, 3H), 2.42 (s, 3H), 1.55 (d, *J* = 7.0 Hz, 3H); <sup>13</sup>C NMR (100 MHz, CDCl<sub>3</sub>): 165.8, 154.3, 135.3, 132.9, 127.7, 125.9, 121.8, 116.0, 112.7, 108.6, 51.0, 30.6, 29.5, 21.6, 21.0, 10.5; IR (neat): 1715, 1644, 1436, 1370, 1197, 1181, 1111, 822, 800 cm<sup>-1</sup>; HRMS (APCI) calc for C<sub>17</sub>H<sub>22</sub>O<sub>2</sub>N (M+H)<sup>+</sup> 272.1645 found 272.1646; HPLC: (AD-H, 1% isopropanol in hexane, 0.7 mL/min) retention times of 7.9 (major) and 10.5 (minor), 88 % ee; [α]<sub>D</sub><sup>25</sup> 354.1 (*c* = 1.13, CHCl<sub>3</sub>).

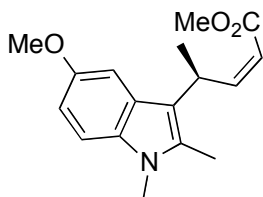

**(*S,Z*)-Methyl 4-(5-methoxy-1,2-dimethyl-1*H*-indol-3-yl)pent-2-enoate (**18**):**

Derived from 5-methoxy-1,2-dimethyl-1*H*-indole (**S-6**) (158 mg, 0.90 mmol, 6.0 equiv.) and *trans*-methyl vinyl diazoacetate (**1b**) (21 mg, 0.15 mmol, 1.0 equiv.), and purified by flash chromatography on silica gel (85/15 pentane/Et<sub>2</sub>O, R<sub>f</sub>: 0.28) to provide product **18** as a colorless powder (31.0 mg, 72% yield).

Spectroscopic data on the purified products was consistent with reported value.<sup>1</sup> HPLC: (AD-H, 1% isopropanol in hexane, 0.7 mL/min) retention times of 15.4 (major) and 22.1 (minor), 86 % ee; [α]<sub>D</sub><sup>25</sup> 377.6 (*c* = 0.52, CHCl<sub>3</sub>).

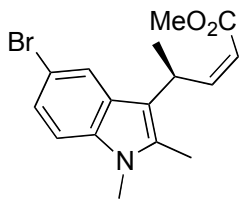

**(*S,Z*)-methyl 4-(5-bromo-1,2-dimethyl-1*H*-indol-3-yl)pent-2-enoate (**19**):**

Derived from 5-bromo-1,2-dimethyl-1*H*-indole (**S-7**) (202 mg, 0.90 mmol, 6.0 equiv.) and *trans*-methyl vinyldiazoacetate (**1b**) (21 mg, 0.15 mmol, 1.0 equiv.), and purified by flash chromatography on silica gel (85/15 pentane/Et<sub>2</sub>O, R<sub>f</sub>: 0.34) to provide product **19** as a colorless powder (40.8 mg, 81% yield).

<sup>1</sup>H NMR (400 MHz, CDCl<sub>3</sub>): 7.78 (d, *J* = 1.8 Hz, 1H), 7.21 (dd, *J* = 8.8, 1.8 Hz, 1H), 7.10 (d, *J* = 8.6 Hz, 1H), 6.70 (dd, *J* = 11.6, 10.7 Hz, 1H), 5.70 (dd, *J* = 11.3, 0.9 Hz, 1H), 5.09-5.18 (m, 1H), 3.73 (s, 3H), 3.61 (s, 3H), 2.43 (s, 3H), 1.52 (d, *J* = 7.0 Hz, 3H); <sup>13</sup>C NMR (100 MHz, CDCl<sub>3</sub>): 166.7, 153.5, 135.6, 134.3, 127.5, 123.0, 121.5, 116.6, 113.2, 111.9, 110.3, 51.1, 30.3, 29.6, 20.9, 10.6; IR (neat): 2948, 1716, 1473, 1435, 1174, 825, 789 cm<sup>-1</sup>; HRMS (APCI) calc for C<sub>16</sub>H<sub>19</sub>O<sub>2</sub>NBr (M+H)<sup>+</sup> 336.0594 found 336.0598; M. P.: 103-105 °C; HPLC: (OJ, 3% isopropanol in hexane, 1.0 mL/min) retention times of 11.9 (major) and 15.8 (minor), 88% ee; [α]<sub>D</sub><sup>25</sup> 299.3 (*c* = 0.97, CHCl<sub>3</sub>).

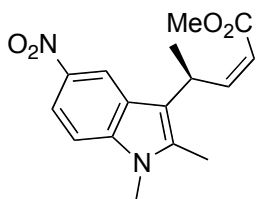

**(*S,Z*)-methyl 4-(1,2-dimethyl-5-nitro-1*H*-indol-3-yl)pent-2-enoate (**20**):**

Derived from 5-nitro-1,2-dimethyl-1*H*-indole (**S-8**) (171 mg, 0.90 mmol, 6.0 equiv.) and *trans*-methyl vinyldiazoacetate (**1b**) (21 mg, 0.15 mmol, 1.0 equiv.) at -20 °C, and purified by flash chromatography on silica gel (7/3 pentane/Et<sub>2</sub>O, R<sub>f</sub>: 0.22) to provide product **20** as a yellowish powder (21.6 mg, 48% yield).

<sup>1</sup>H NMR (400 MHz, CDCl<sub>3</sub>): 8.60 (d, *J* = 2.1 Hz, 1H), 8.04 (dd, *J* = 9.2, 2.2 Hz, 1H), 7.25 (d, *J* = 2.2 Hz, 1H), 6.72 (dd, *J* = 11.3, 10.7 Hz, 1H), 5.75 (dd, *J* = 11.3, 0.9 Hz, 1H), 5.14-5.21 (m, 1H), 3.73 (s, 3H), 3.69 (s, 3H), 2.48 (s, 3H), 1.55 (d, *J* = 7.0 Hz, 3H); <sup>13</sup>C NMR (100 MHz, CDCl<sub>3</sub>): 166.6, 152.8, 140.8, 139.8, 136.6, 125.1, 117.3, 116.4, 116.3,

116.2, 108.5, 51.2, 30.2, 30.1, 21.1, 10.8; IR (neat): 2950, 1716, 1512, 1485, 1329, 1195, 1176, 825, 740  $\text{cm}^{-1}$ ; HRMS (APCI) calc for  $\text{C}_{16}\text{H}_{19}\text{O}_4\text{N}_2$  ( $\text{M}+\text{H}$ )<sup>+</sup> 303.1339 found 303.1339; M. P.: 134-136 °C; HPLC: (AD-H, 10% isopropanol in hexane, 1.0 mL/min) retention times of 14.9 (major) and 15.7 (minor), 87% ee;  $[\alpha]_{\text{D}}^{25}$  287.6 ( $c = 1.56$ ,  $\text{CHCl}_3$ ).

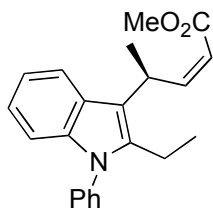

**(*S,Z*)-methyl 4-(2-ethyl-1-phenyl-1*H*-indol-3-yl)pent-2-enoate (21):**

Derived from 1-phenyl-2-ethyl-1*H*-indole (**S-9**) (199 mg, 0.90 mmol, 6.0 equiv.) and *trans*-methyl vinyldiazoacetate (**1b**) (21 mg, 0.15 mmol, 1.0 equiv.), and purified by flash chromatography on silica gel (10/1 pentane/Et<sub>2</sub>O, R<sub>f</sub>: 0.50) to provide product **21** as colorless oil (43.1 mg, 86% yield).

<sup>1</sup>H NMR (400 MHz, CDCl<sub>3</sub>): 7.74-7.78 (m, 1H), 7.50-7.56 (m, 2H), 7.43-7.49 (m, 1H), 7.33-7.39 (m, 1H), 7.05-7.15 (m, 2H), 6.99-7.04 (m, 1H), 6.90 (t,  $J = 10.5$  Hz, 1H), 5.74 (dd,  $J = 11.3, 0.8$  Hz, 1H), 5.21-5.29 (m, 1H), 3.75 (s, 3H), 2.65-2.85 (m, 2H), 1.64 (d,  $J = 7.0$  Hz, 3H), 0.96 (t,  $J = 7.8$  Hz, 3H); <sup>13</sup>C NMR (100 MHz, CDCl<sub>3</sub>): 166.8, 154.0, 139.5, 138.2, 138.0, 129.4, 128.6, 127.9, 126.0, 120.9, 119.3, 119.2, 116.4, 113.9, 110.4, 51.1, 30.6, 21.1, 18.0, 14.9; IR (neat): 2968, 1719, 1597, 1499, 1458, 1370, 1177, 824, 742, 700  $\text{cm}^{-1}$ ; HRMS (APCI) calc for  $\text{C}_{22}\text{H}_{24}\text{O}_2\text{N}$  ( $\text{M}+\text{H}$ )<sup>+</sup> 334.1802 found 334.1801; HPLC: (AD-H, hexane, 1.0 mL/min) retention times of 9.0 (major) and 9.7 (minor), 94% ee;  $[\alpha]_{\text{D}}^{25}$  276.2 ( $c = 1.36$ ,  $\text{CHCl}_3$ ).

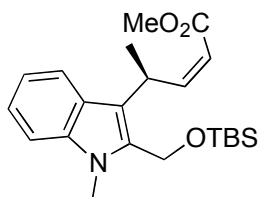

**(*S,Z*)-methyl 4-(2-(((*tert*-butyldimethylsilyloxy)methyl)-1-methyl-1*H*-indol-3-yl)pent-2-enoate (22):**

Derived from 2-(((*tert*-butyldimethylsilyloxy)methyl)-1-methyl-1*H*-indole (**S-10**) (248

mg, 0.90 mmol, 6.0 equiv.) and *trans*-methyl vinyl diazoacetate (**1b**) (21 mg, 0.15 mmol, 1.0 equiv.), and purified by flash chromatography in silica gel (30/1 pentane/Et<sub>2</sub>O, R<sub>f</sub>: 0.35) to provide product **22** as a colorless powder (37.2 mg, 64% yield).

Spectroscopic data on the purified products was consistent with reported value.<sup>1</sup> HPLC: (OD, 0.5% isopropanol in hexane, 0.7 mL/min) retention times of 13.9 (minor) and 16.2 (major), 91% ee;  $[\alpha]_D^{25}$  237.3 (*c* = 0.76, CHCl<sub>3</sub>).

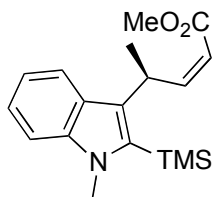

**(*S,Z*)-methyl 4-(1-methyl-2-(trimethylsilyl)-1*H*-indol-3-yl)pent-2-enoate (**23**):**

Derived from 1-methyl-2-(trimethylsilyl)-1*H*-indole (**S-11**) (199 mg, 0.90 mmol, 6.0 equiv.) and *trans*-methyl vinyl diazoacetate (**1b**) (21 mg, 0.15 mmol, 1.0 equiv.), and purified by flash chromatography on silica gel (20/1 pentane/Et<sub>2</sub>O, R<sub>f</sub>: 0.46) to provide product **23** as colorless oil (34.8 mg, 74% yield).

<sup>1</sup>H NMR (400 MHz, CDCl<sub>3</sub>): δ 7.77 (d, *J* = 8.2 Hz, 1H), 7.33 (d, *J* = 8.4 Hz, 1H), 7.23 (t, *J* = 7.6 Hz, 1H), 7.08 (t, *J* = 7.9 Hz, 1H), 7.00 (dd, *J* = 11.4, 9.8 Hz, 1H), 5.74 (dd, *J* = 11.4, 0.8 Hz, 1H), 5.15-5.24 (m, 1H), 3.81 (s, 3H), 3.76 (s, 3H), 1.61 (d, *J* = 7.0 Hz, 3H), 0.48 (s, 9H); <sup>13</sup>C NMR (100 MHz, CDCl<sub>3</sub>): δ 166.4, 154.4, 140.5, 136.1, 127.6, 125.7, 122.0, 120.4, 118.4, 117.1, 109.6, 51.1, 33.3, 32.1, 22.1, 1.6; IR (neat): 2950, 1719, 1405, 1250, 1193, 1174, 839, 738 cm<sup>-1</sup>; HRMS (APCI) calc. for C<sub>18</sub>H<sub>26</sub>O<sub>2</sub>NSi (M+H)<sup>+</sup> 316.1727 found 316.1728; HPLC: (OD-H, hexane, 1.0 mL/min) retention times of 4.9 (major) and 6.1 (minor), 92% ee;  $[\alpha]_D^{25}$  189.9 (*c* = 0.91, CHCl<sub>3</sub>).

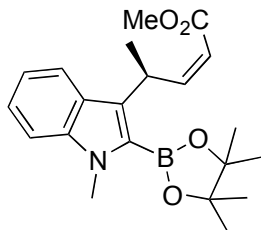

**(*S,Z*)-methyl 4-(1-methyl-2-(4,4,5,5-tetramethyl-1,3,2-dioxaborolan-2-yl)-1*H*-indol-3-yl)pent-2-enoate (**23**):**

Derived from 1-methyl-2-(4,4,5,5-tetramethyl-1,3,2-dioxaborolan-2-yl)-1*H*-indole (**S-12**) (231 mg, 0.90 mmol, 6.0 equiv.) and *trans*-methyl vinyl diazoacetate (**1b**) (21 mg, 0.15 mmol, 1.0 equiv.) at -20 °C, and purified by flash chromatography on silica gel (10/1 pentane/Et<sub>2</sub>O, R<sub>f</sub>: 0.39) to provide product **23** as colorless oil (45.6 mg, 82% yield).

<sup>1</sup>H NMR (400 MHz, CDCl<sub>3</sub>): δ 7.84 (d, *J* = 8.2 Hz, 1H), 7.32 (d, *J* = 8.4 Hz, 1H), 7.26 (t, *J* = 7.4 Hz, 1H), 7.09 (t, *J* = 7.4 Hz, 1H), 6.93 (dd, *J* = 11.4, 10.2 Hz, 1H), 5.69 (d, *J* = 11.4 Hz, 1H), 5.51-5.61 (m, 1H), 3.93 (s, 3H), 3.74 (s, 3H), 1.61 (d, *J* = 7.4 Hz, 3H), 1.39 (s, 6H), 1.38 (s, 6H); <sup>13</sup>C NMR (100 MHz, CDCl<sub>3</sub>): δ 166.5, 154.7, 140.1, 131.1, 126.1, 123.1, 120.9, 118.6, 116.6, 109.9, 83.5, 50.9, 32.2, 31.3, 24.83, 24.79, 21.8; IR (neat): 2976, 1723, 1525, 1391, 1299, 1260, 1172, 1138, 847, 823, 742 cm<sup>-1</sup>; HRMS (APCI) calc. for C<sub>21</sub>H<sub>29</sub>O<sub>4</sub>NB (M+H)<sup>+</sup> 370.2184 found 370.2185; HPLC: (AD-H, 3% isopropanol in hexane, 1.0 mL/min) retention times of 9.3 (major) and 12.4 (minor), 94% ee; [α]<sub>D</sub><sup>25</sup> 172.0 (*c* = 1.60, CHCl<sub>3</sub>).

**General procedure for the reaction between pyrroles and methyl vinyl diazoacetate:**

To a flame-dried 25 mL flask containing Rh<sub>2</sub>(*S*-biTISP)<sub>2</sub> (5.5 mg, 0.02 equiv.) and indoles (0.90 mmol, 6.0 equiv.) in 6 mL dried CH<sub>2</sub>Cl<sub>2</sub> under argon atmosphere was added a solution of fresh purified *trans*-methyl vinyl diazoacetate (**1b**) (21.0 mg, 0.15 mmol, 1.0 equiv.) in 6 mL dried CH<sub>2</sub>Cl<sub>2</sub> by syringe pump over 3 h at -20 °C. The solution was warmed up to room temperature over night. The mixture was concentrated under reduced pressure and purified by flash chromatography on silica gel (pentane/Et<sub>2</sub>O with 0.5% Et<sub>3</sub>N) to provide the corresponding products as colorless oil or powder.

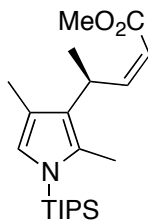

**(*S,Z*)-Methyl 4-(2,4-dimethyl-1-(triisopropylsilyl)-1*H*-pyrrol-3-yl)pent-2-enoate (**25**):**

Derived from 1-triisopropylsilyl-2,4-dimethylpyrrole (**S-13**) (226 mg, 0.90 mmol, 6.0 equiv.) and *trans*-methyl vinyldiazoacetate (**1b**) (21 mg, 0.15 mmol, 1.0 equiv.), and purified by flash chromatography on silica gel (40/1 pentane/Et<sub>2</sub>O, R<sub>f</sub>: 0.38) to provide product **25** as a colorless oil (35.6 mg, 65% yield).

Spectroscopic data on the purified products was consistent with reported value.<sup>1</sup> HPLC: (OD, 0.2% isopropanol in hexane, 0.7 mL/min) retention times of 16.9 (minor) and 25.3 (major), 91% ee;  $[\alpha]_D^{25}$  194.6 ( $c = 1.63$ , CHCl<sub>3</sub>).

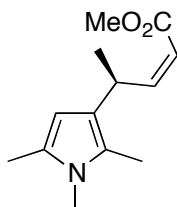

**(*S,Z*)-Methyl 4-(1,2,5-trimethyl-1*H*-pyrrol-3-yl)pent-2-enoate (**26**):**

Derived from 1,2,5-trimethylpyrrole (**S-14**) (98.2 mg, 0.90 mmol, 6.0 equiv.) and *trans*-methyl vinyldiazoacetate (**1b**) (21 mg, 0.15 mmol, 1.0 equiv.), and purified by flash chromatography in silica gel (9/1 pentane/Et<sub>2</sub>O, containing 0.5% Et<sub>3</sub>N, R<sub>f</sub>: 0.45) to provide **26** as a colorless oil (15.3 mg, 46% yield).

Spectroscopic data on the purified products was consistent with reported value.<sup>1</sup> HPLC: (OD-H, 2% isopropanol in hexane, 0.7 mL/min) retention times of 9.8 (minor) and 16.4 (major), 87% ee;  $[\alpha]_D^{25}$  286.1 ( $c = 0.61$ , CHCl<sub>3</sub>).

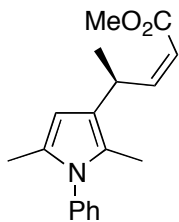

**(*S,Z*)-methyl 4-(2,5-dimethyl-1-phenyl-1*H*-pyrrol-3-yl)pent-2-enoate (**27**):**

Derived from 2,5-dimethyl-1-phenyl-1*H*-pyrrole (**S-15**) (154 mg, 0.90 mmol, 6.0 equiv.) and *trans*-methyl vinyl diazoacetate (**1b**) (21 mg, 0.15 mmol, 1.0 equiv.), and purified by flash chromatography in silica gel (10/1 pentane/Et<sub>2</sub>O, containing 0.5% Et<sub>3</sub>N, R<sub>f</sub>: 0.55) to provide **27** as a colorless oil (30.8 mg, 72% yield).

<sup>1</sup>H NMR (400 MHz, CDCl<sub>3</sub>): 7.82-7.87 (m, 2H), 7.36-7.41 (m, 1H), 7.19-7.23 (m, 2H), 6.30 (t, *J* = 11.0 Hz, 1H), 5.92 (s, 1H), 5.67 (dd, *J* = 11.0, 0.8 Hz, 1H), 4.82-4.91 (m, 1H), 3.73 (s, 3H), 2.04 (s, 3H), 1.97 (s, 3H), 1.37 (d, *J* = 7.0 Hz, 3H); <sup>13</sup>C NMR (100 MHz, CDCl<sub>3</sub>): 167.0, 155.4, 138.9, 128.9, 128.3, 127.9, 127.5, 125.1, 121.5, 115.1, 103.5, 51.0, 29.8, 21.1, 12.9, 10.7; IR (neat): 2921, 1718, 1499, 1404, 1193, 1174, 1008, 826, 766, 699 cm<sup>-1</sup>; HRMS (APCI) calc for C<sub>18</sub>H<sub>22</sub>O<sub>2</sub>N (M+H)<sup>+</sup> 284.1645 found 284.1648; HPLC: (OJ, 1% isopropanol in hexane, 0.7 mL/min) retention times of 16.8 (major) and 18.8 (major), 89% ee; [α]<sub>D</sub><sup>25</sup> 287.2 (*c* = 1.71, CHCl<sub>3</sub>).



## Crystal Structure of 17

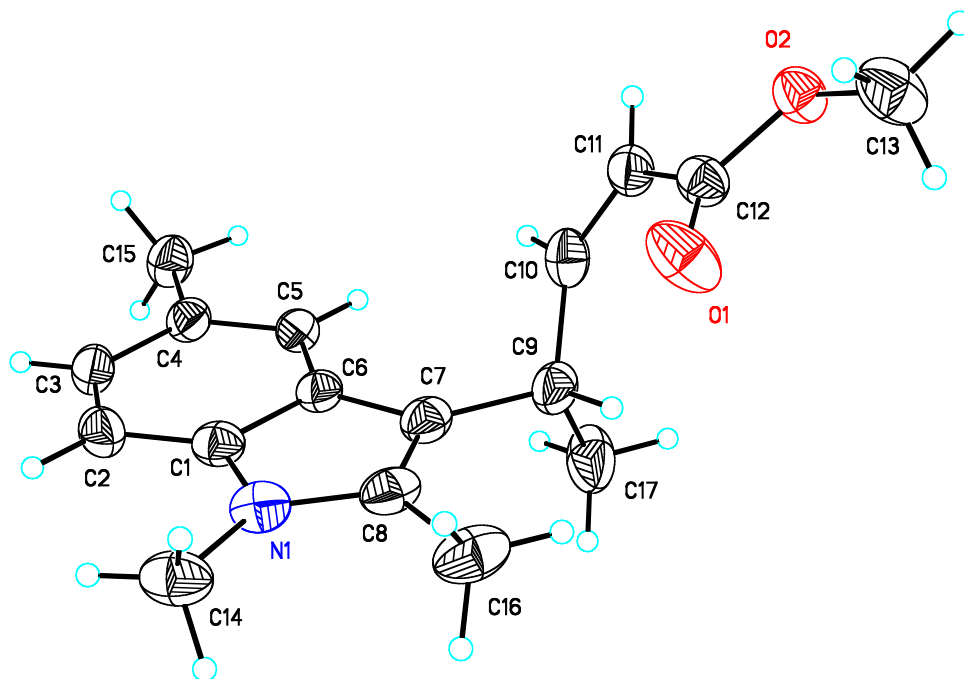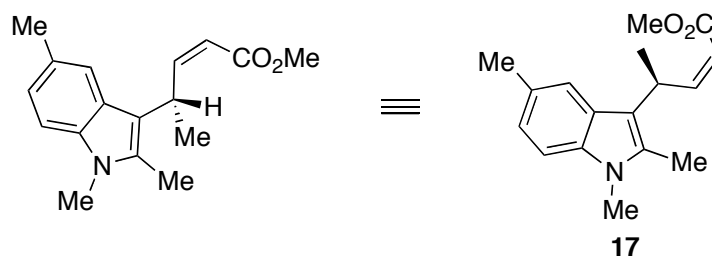

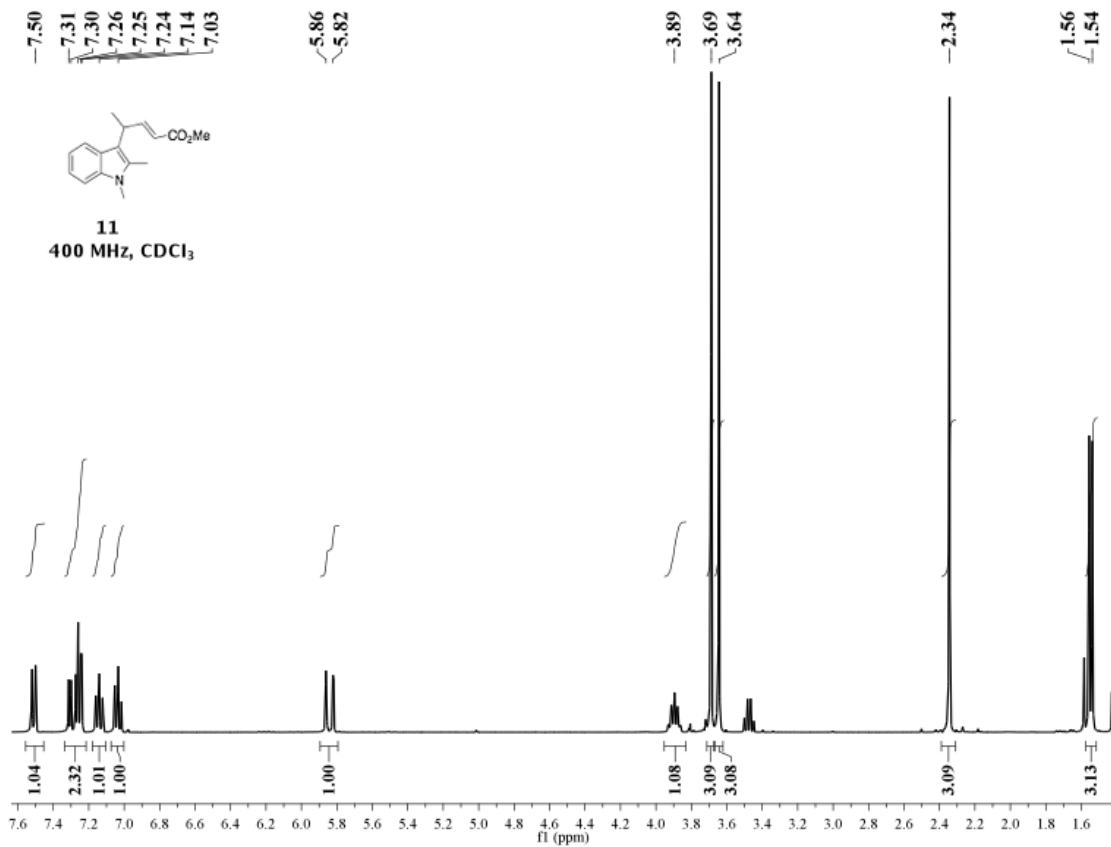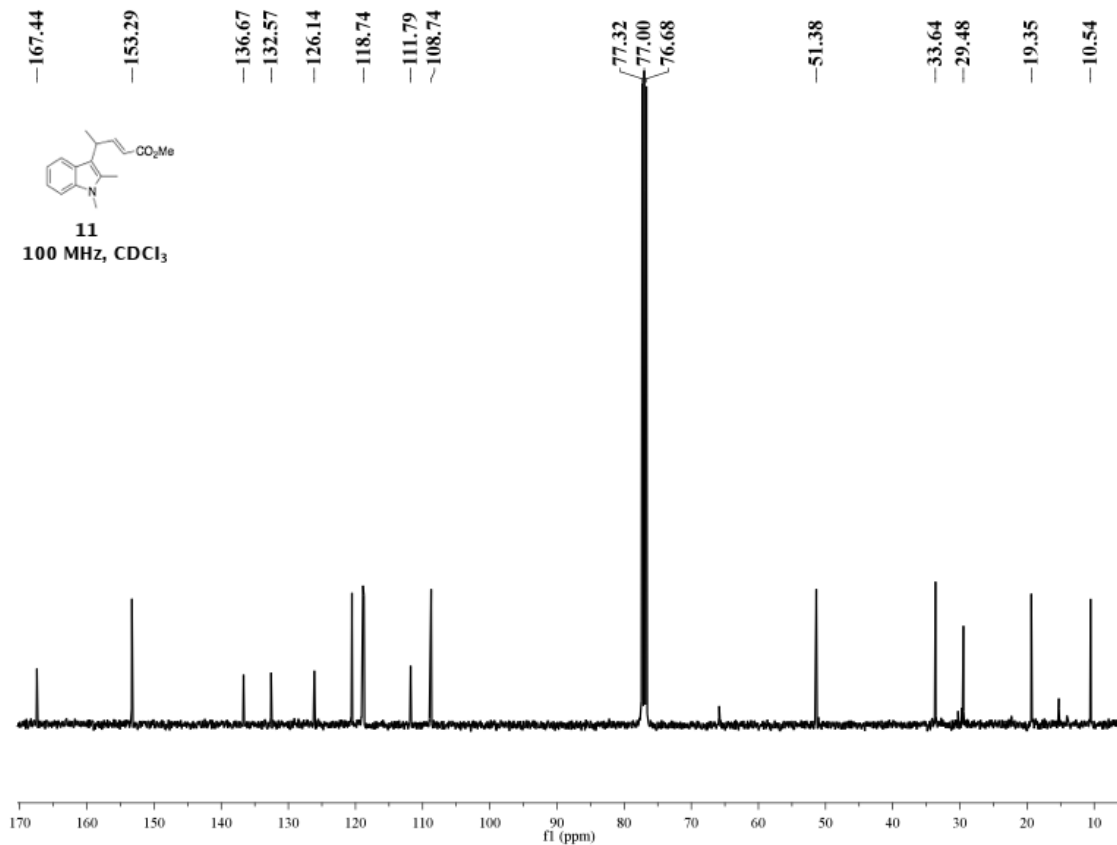

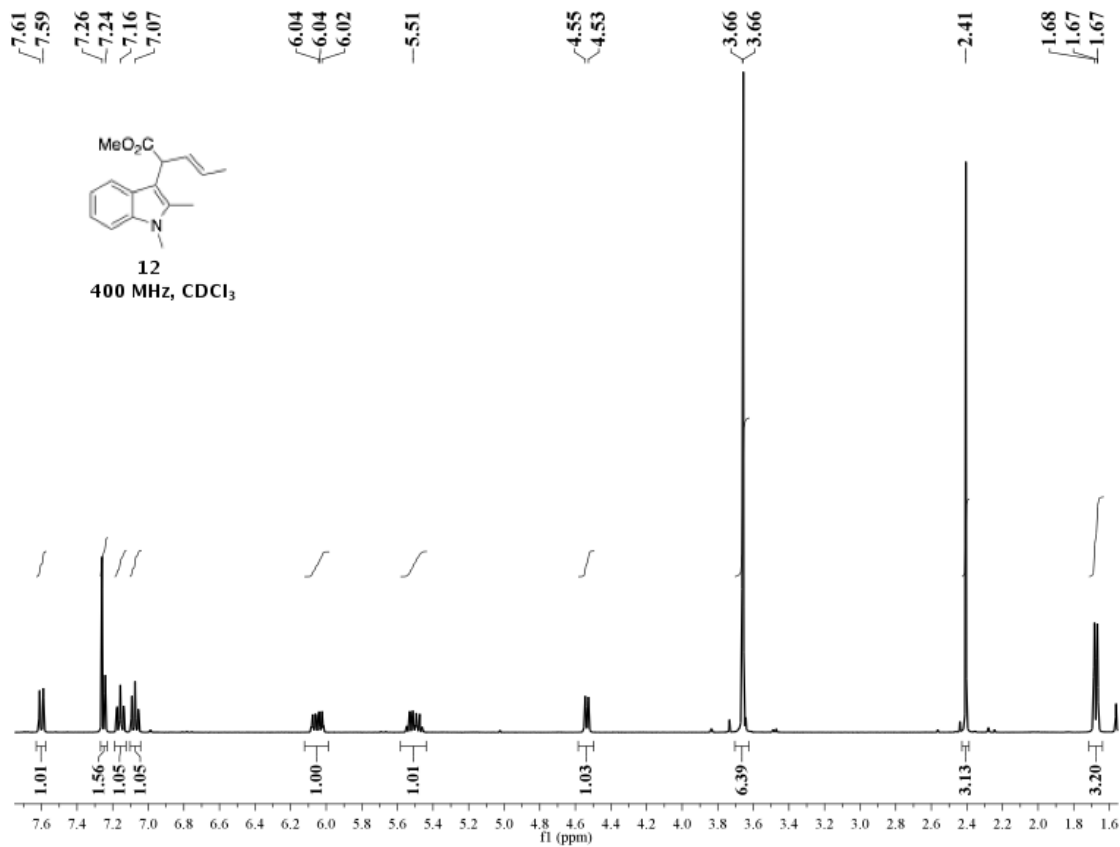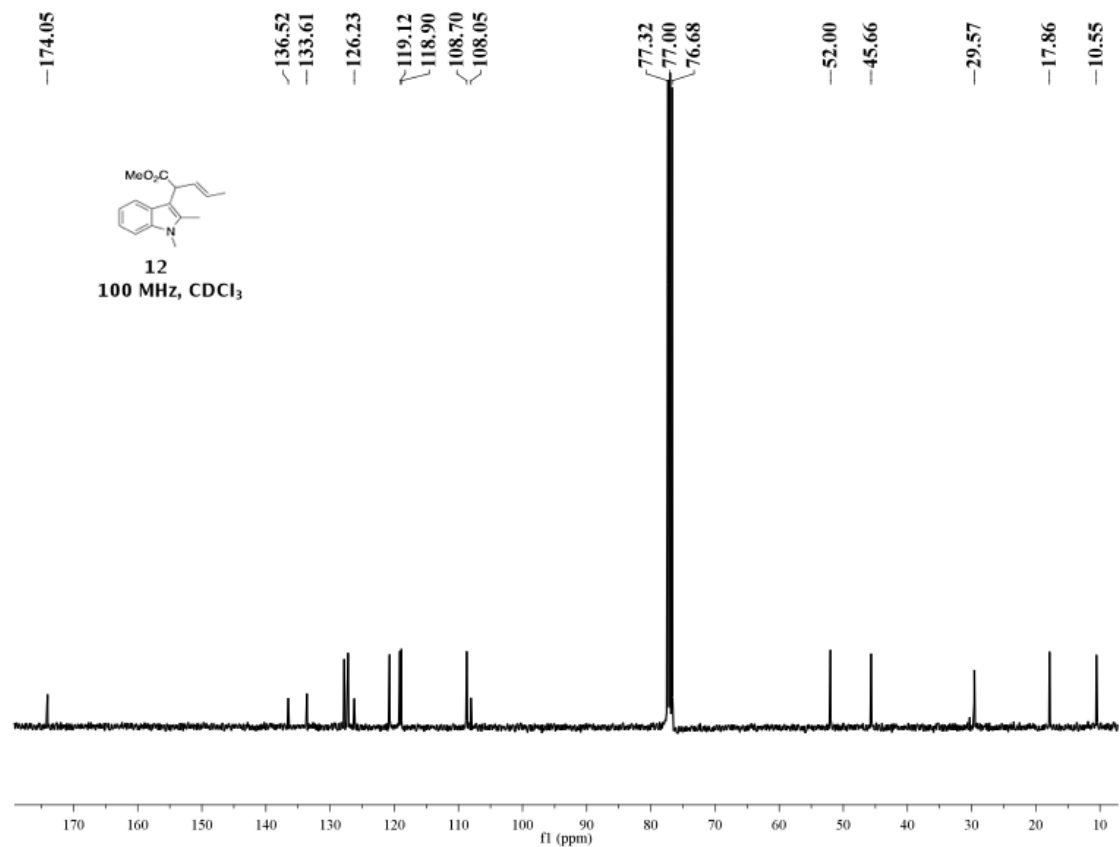

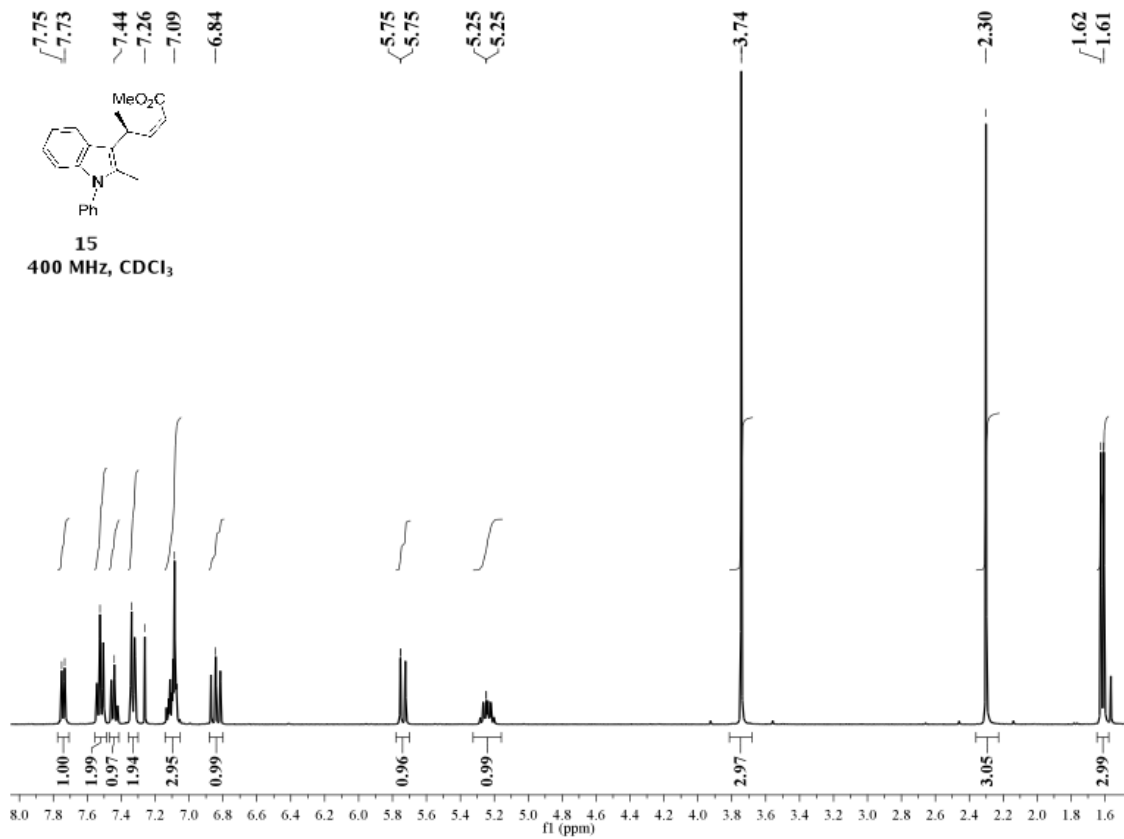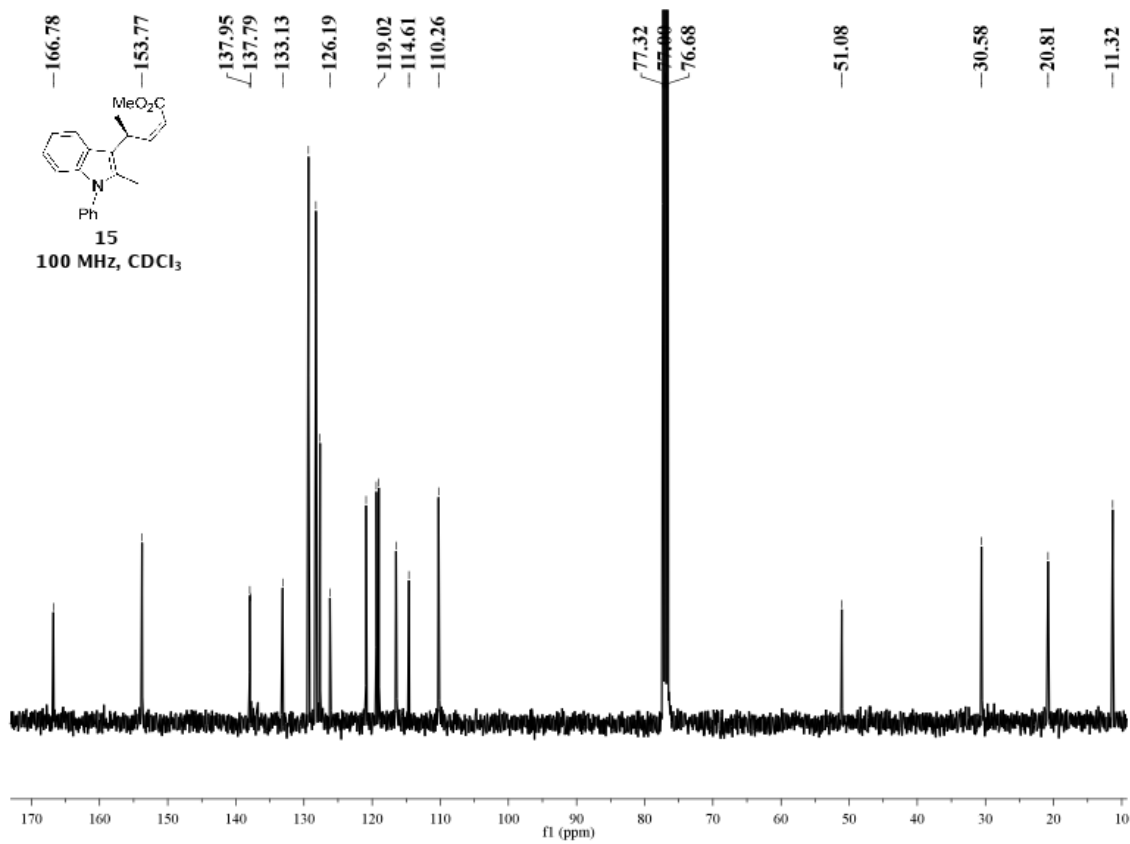

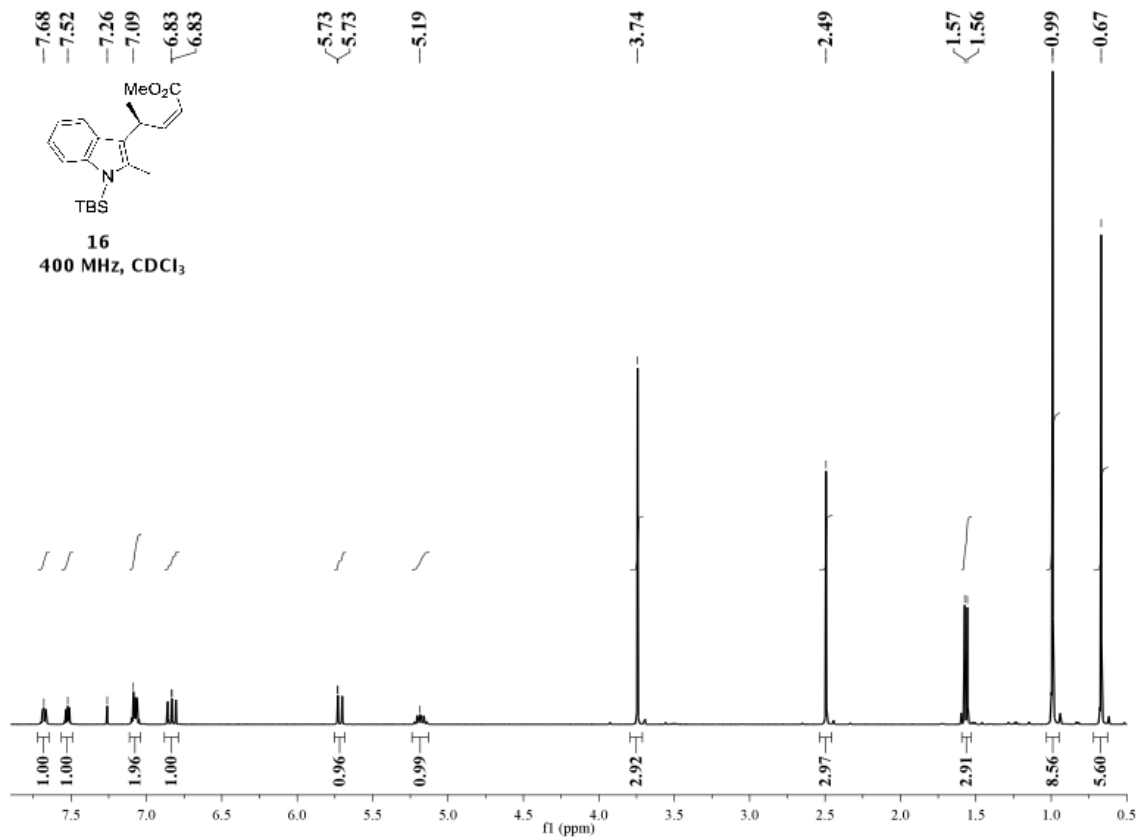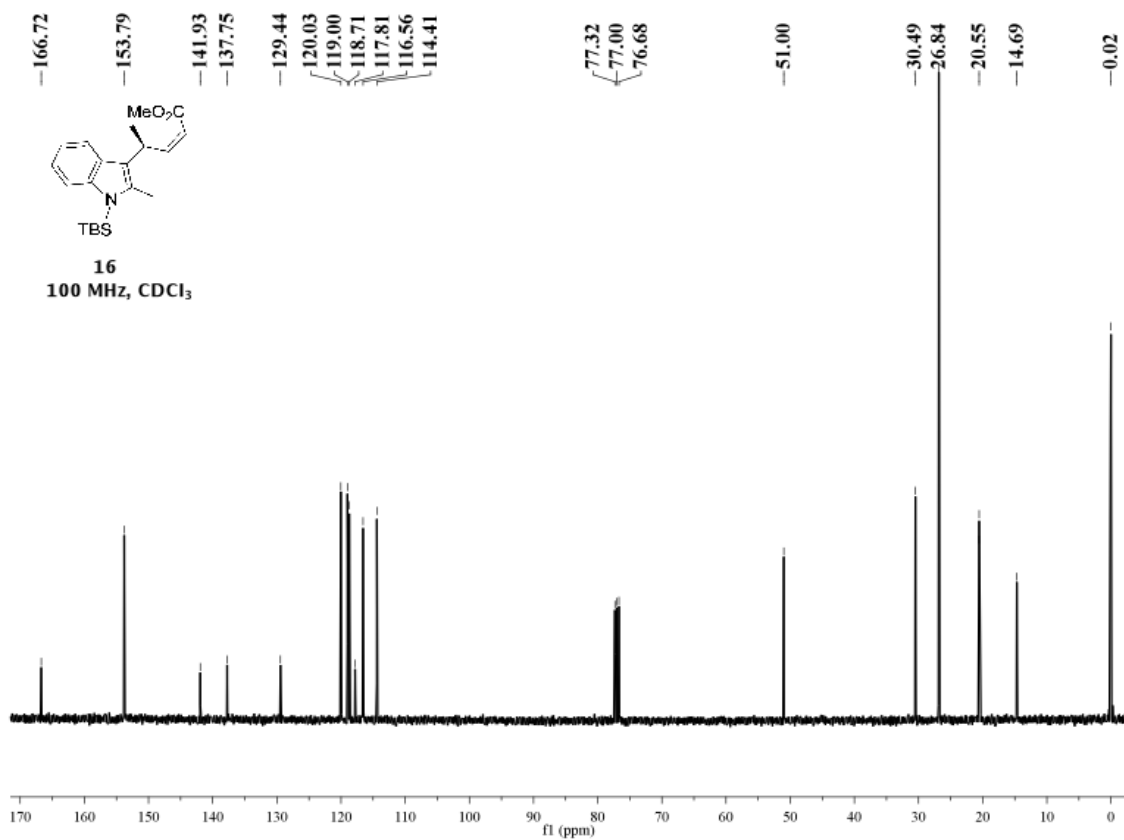

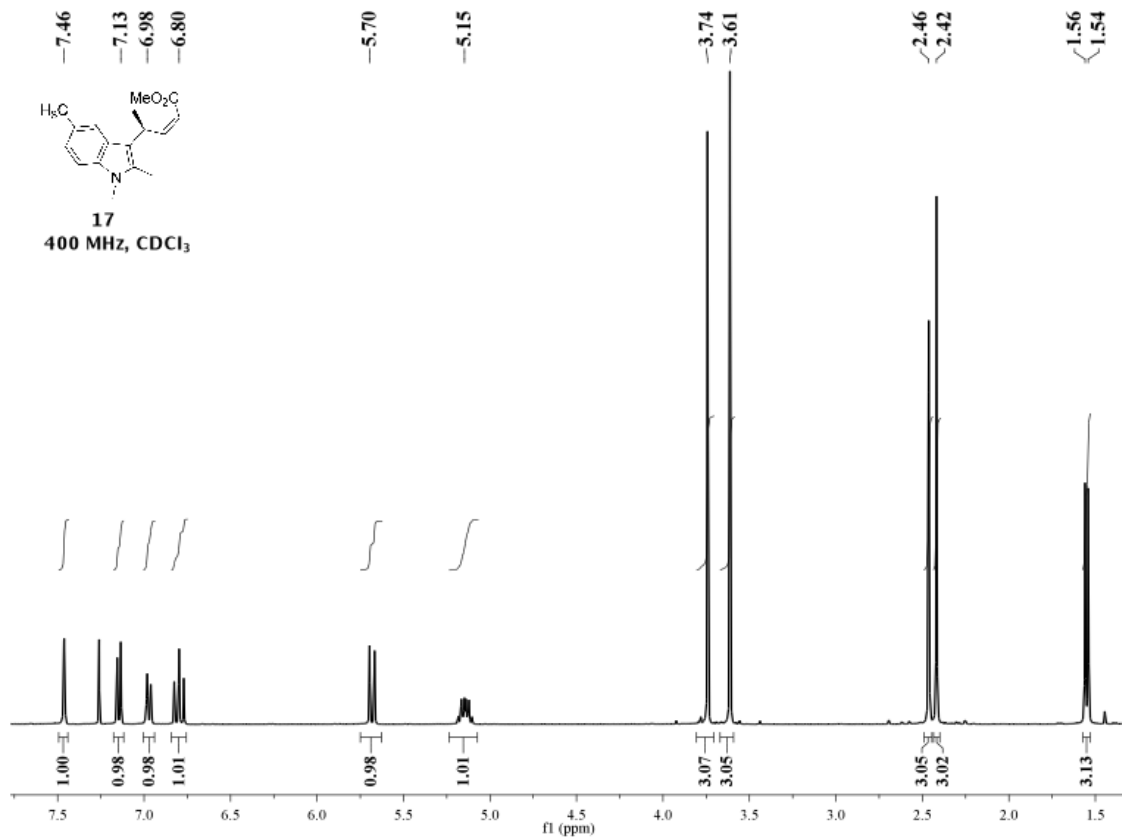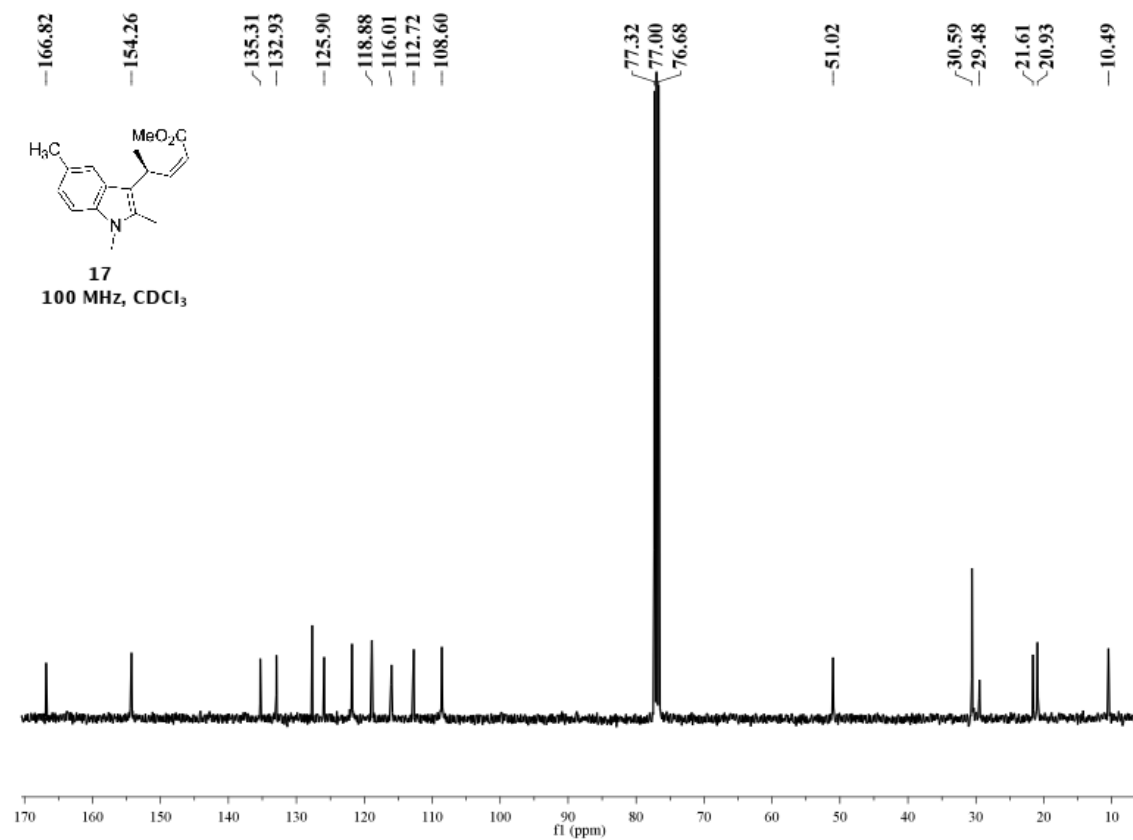

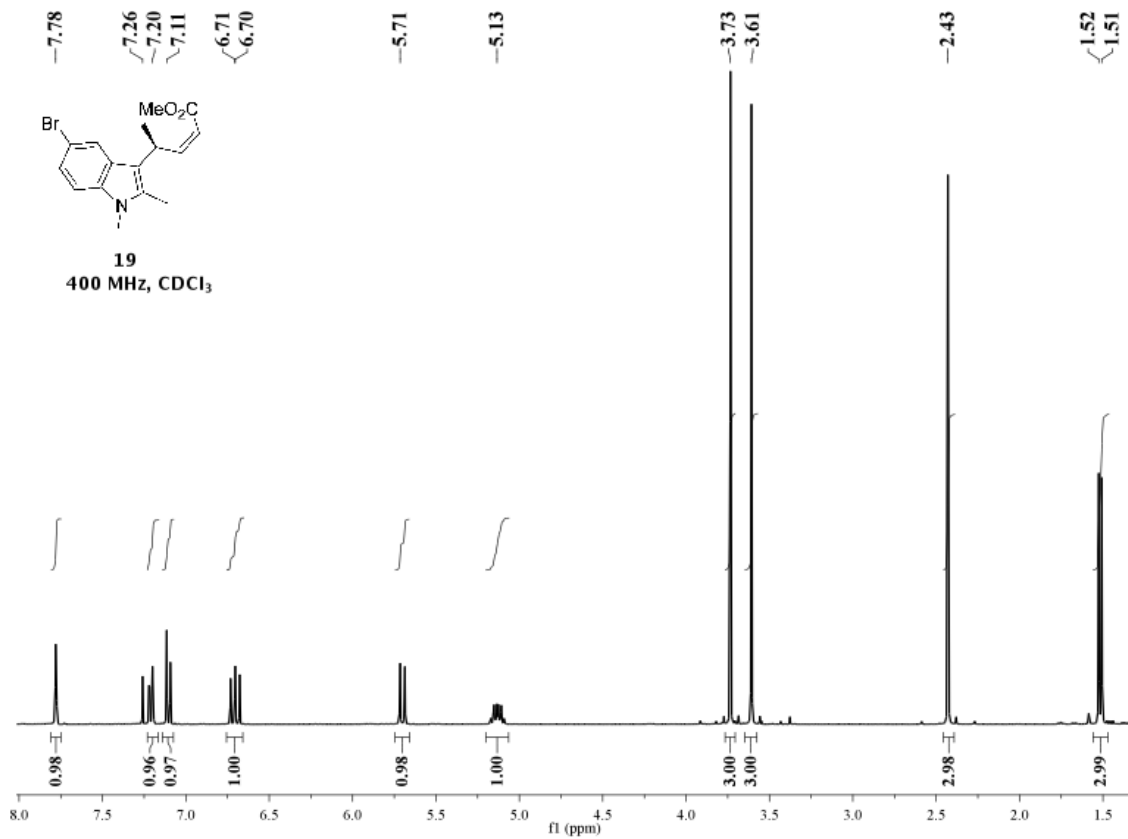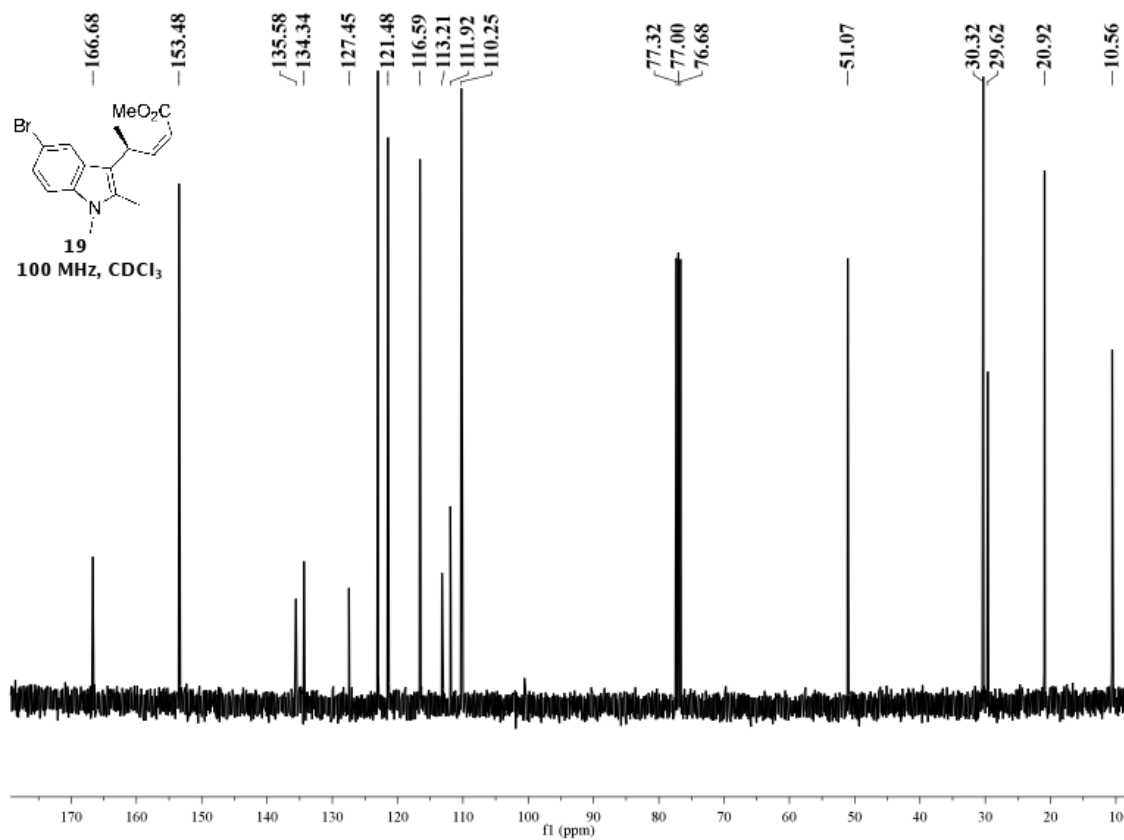

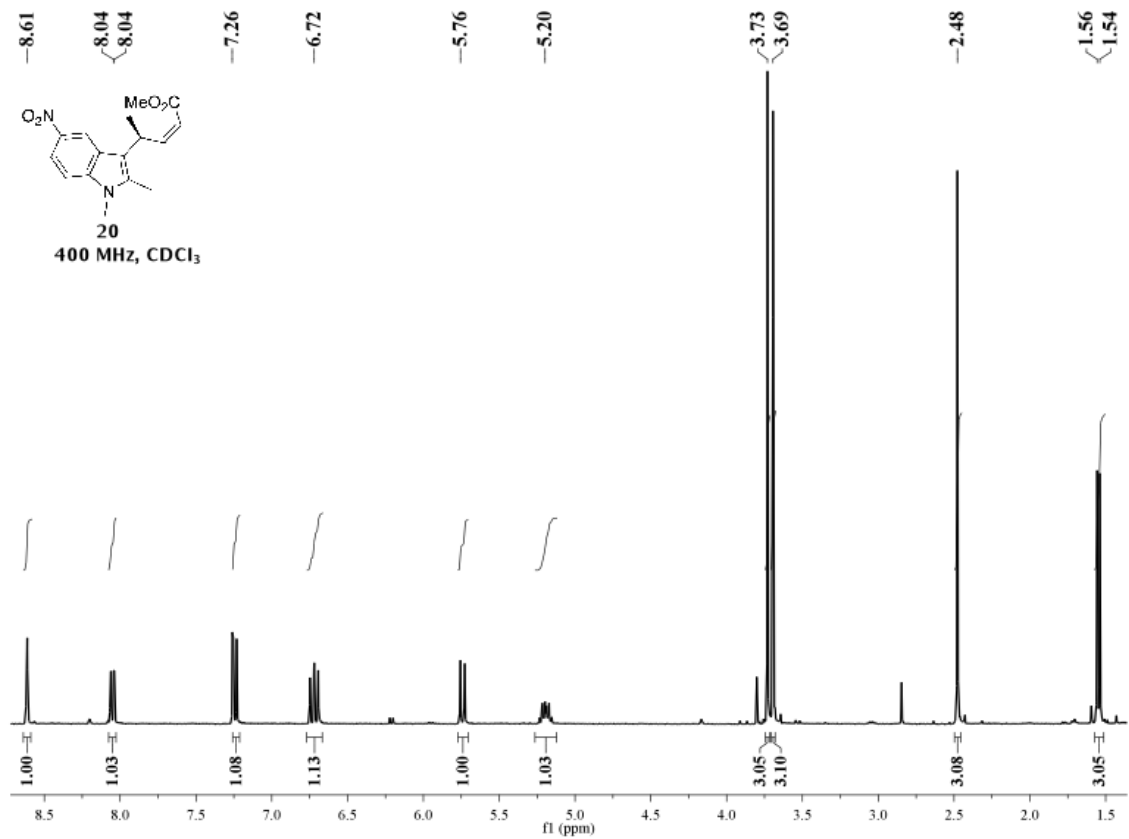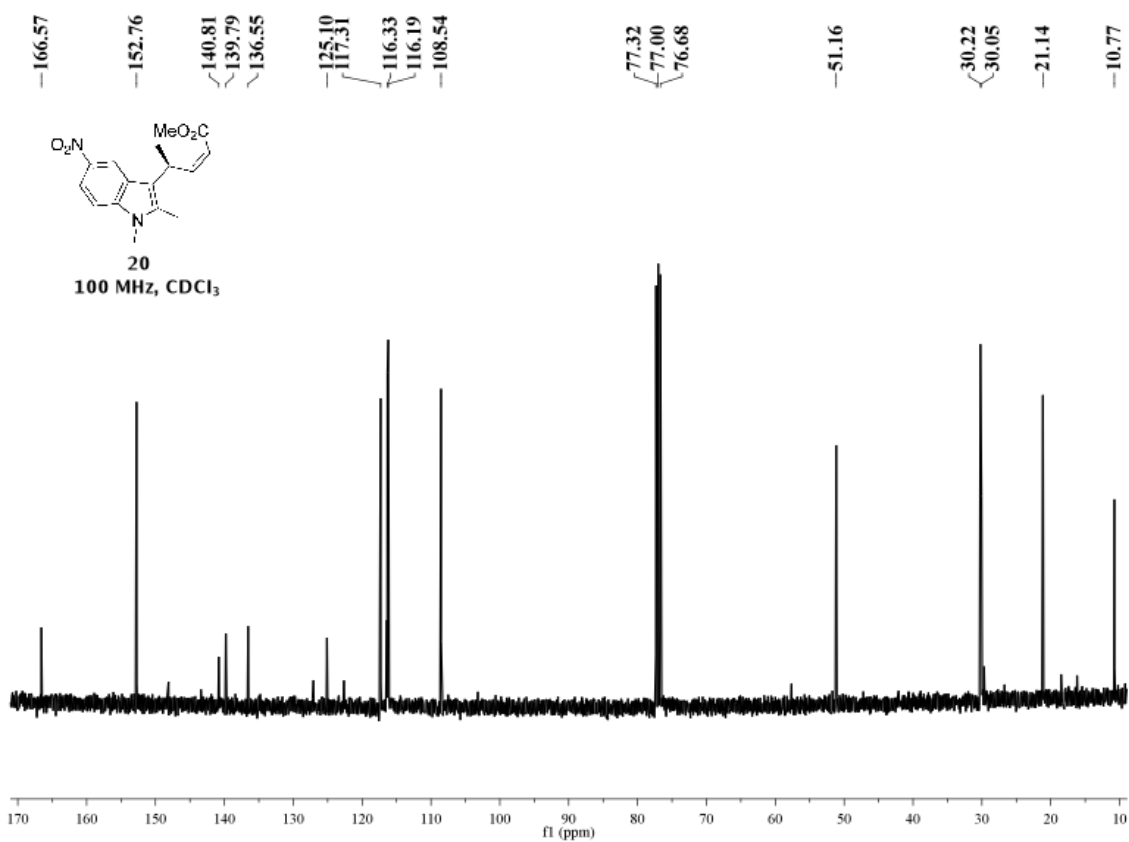



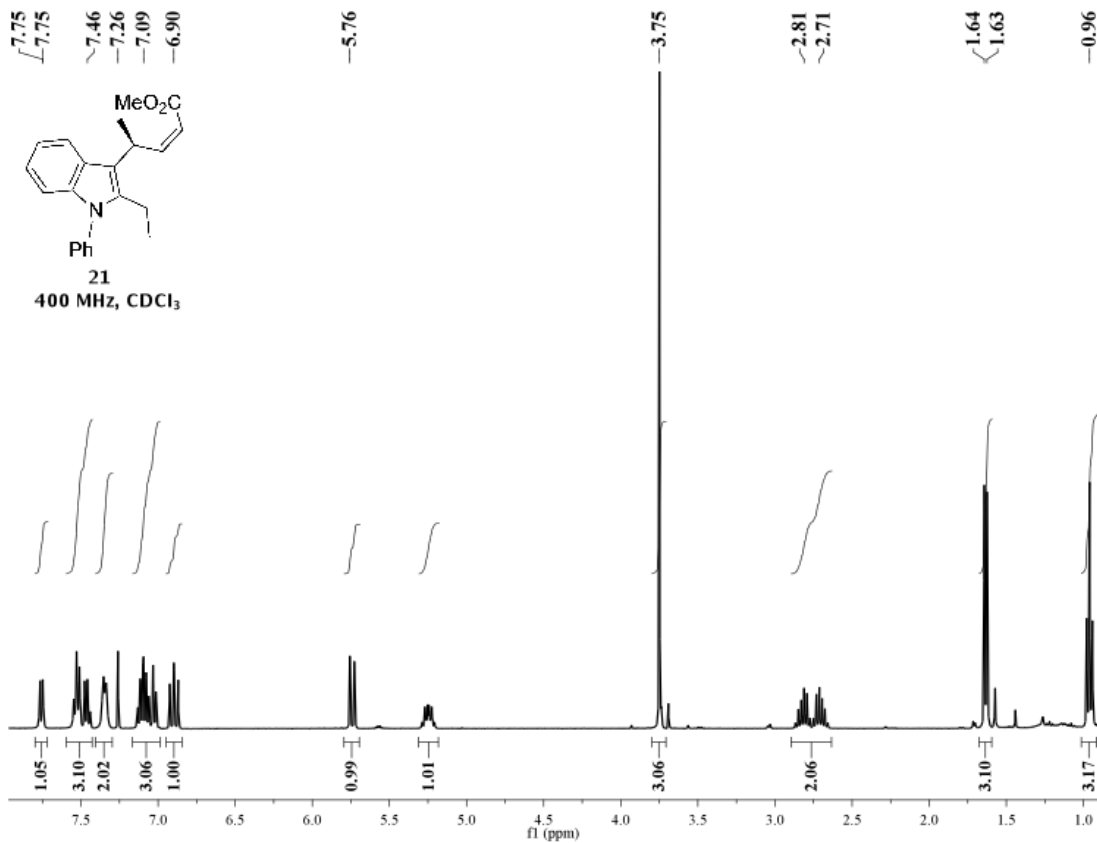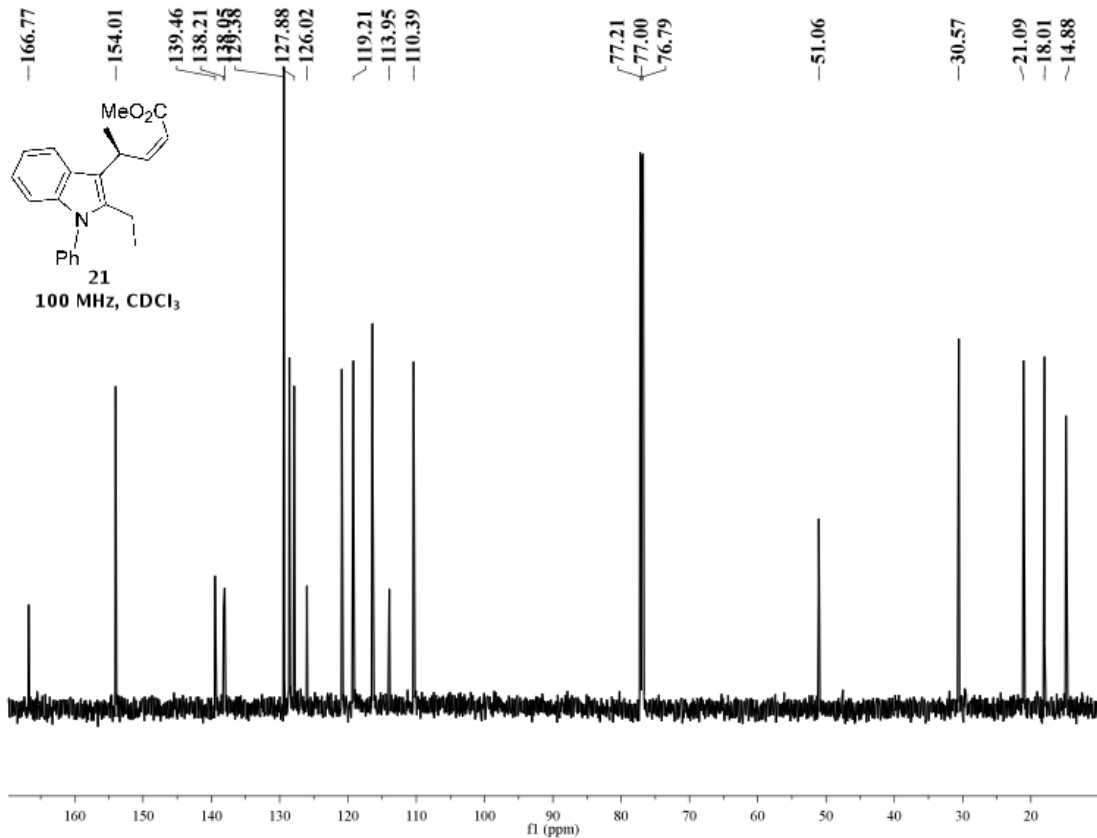

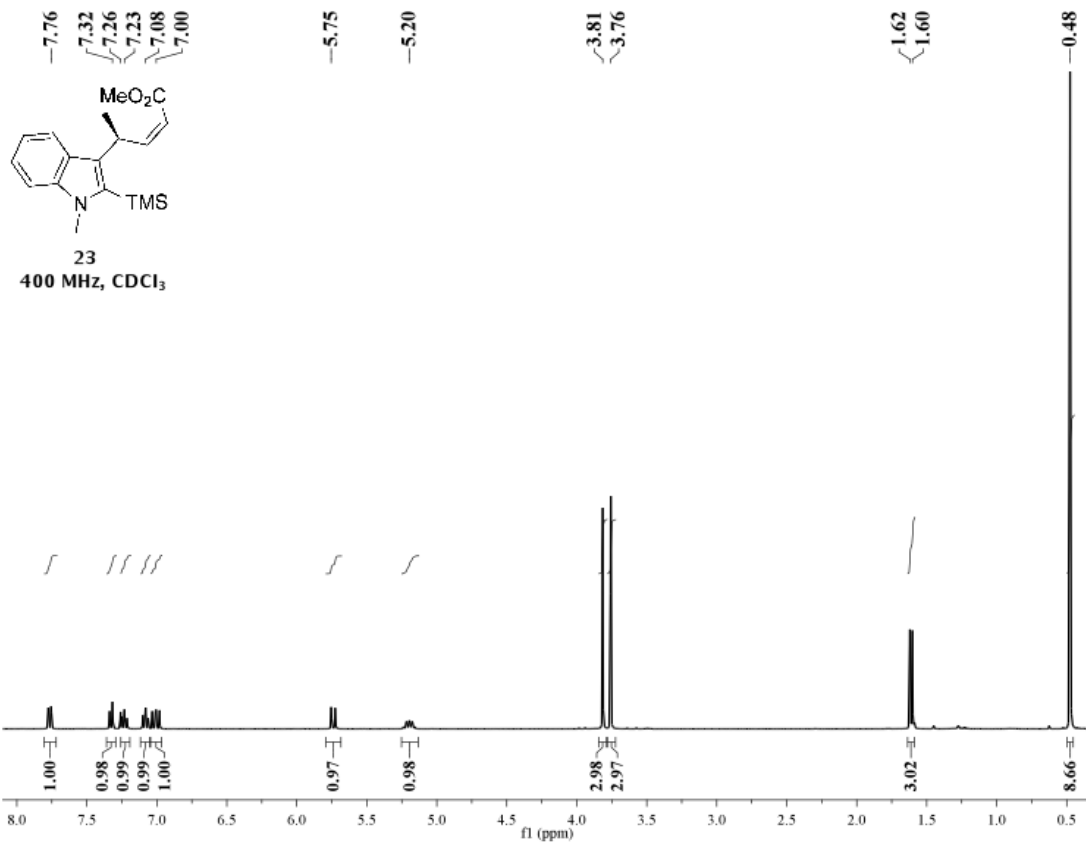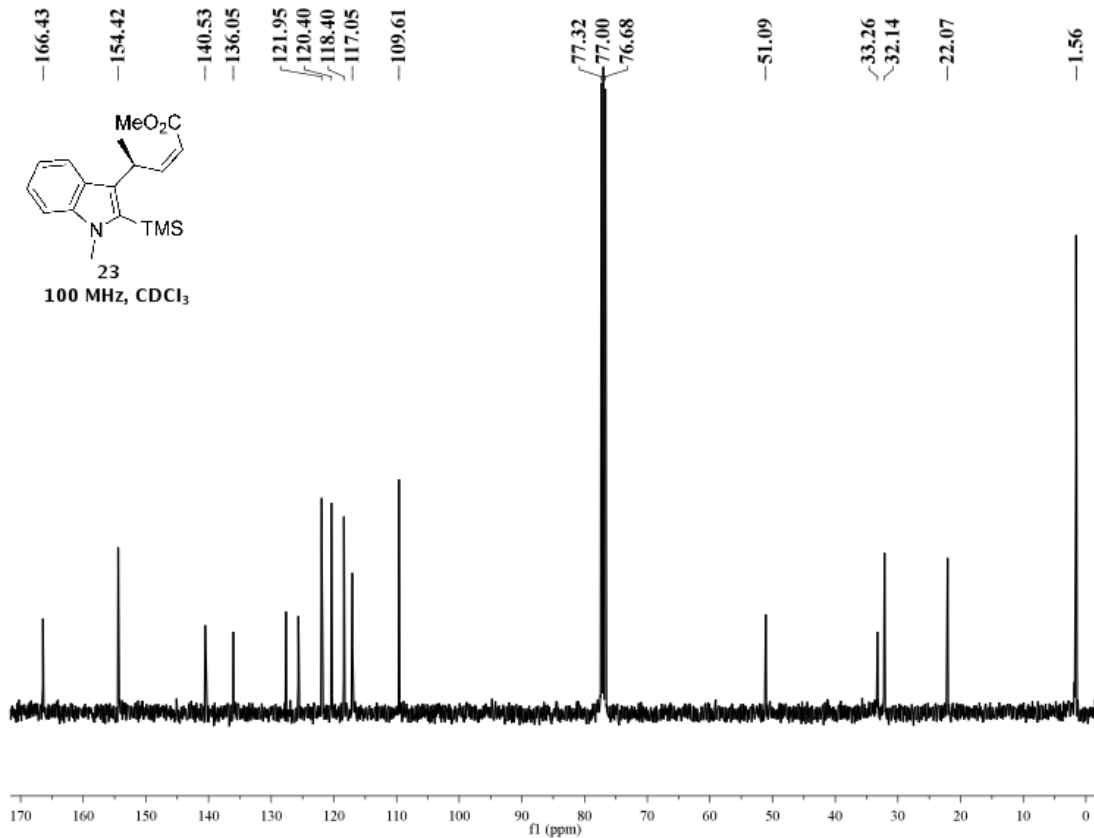

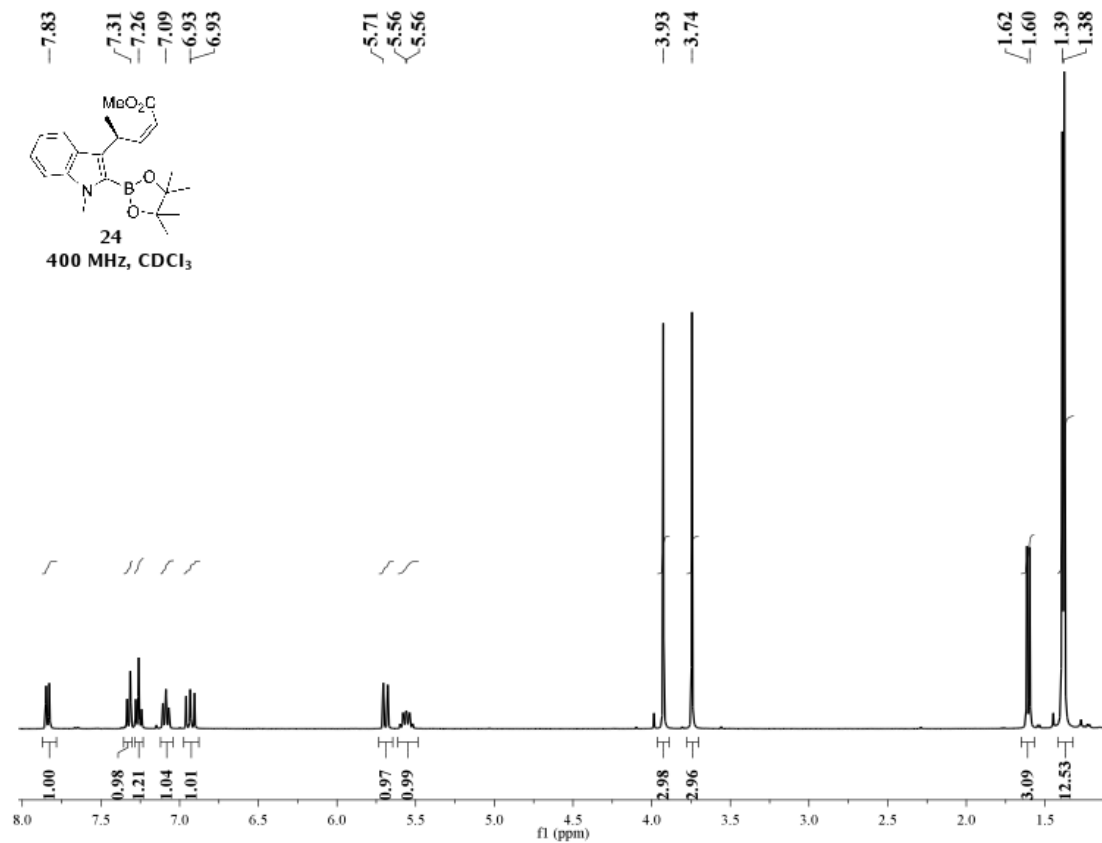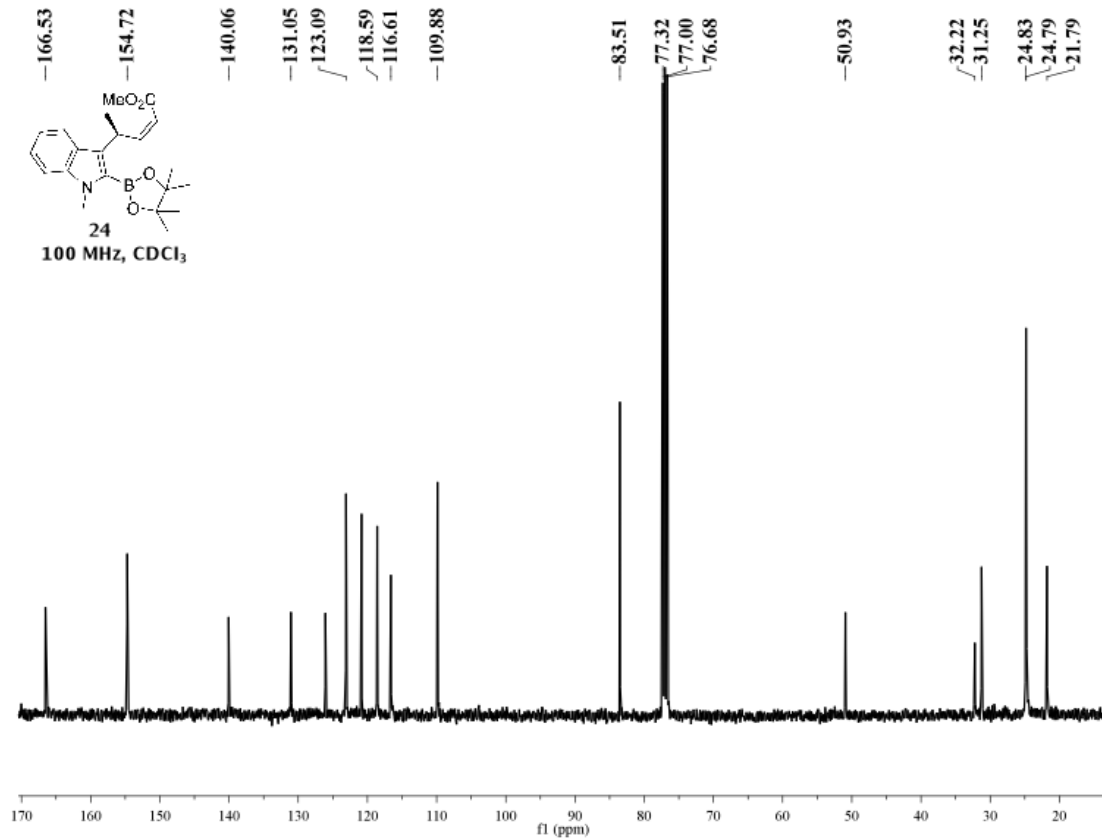

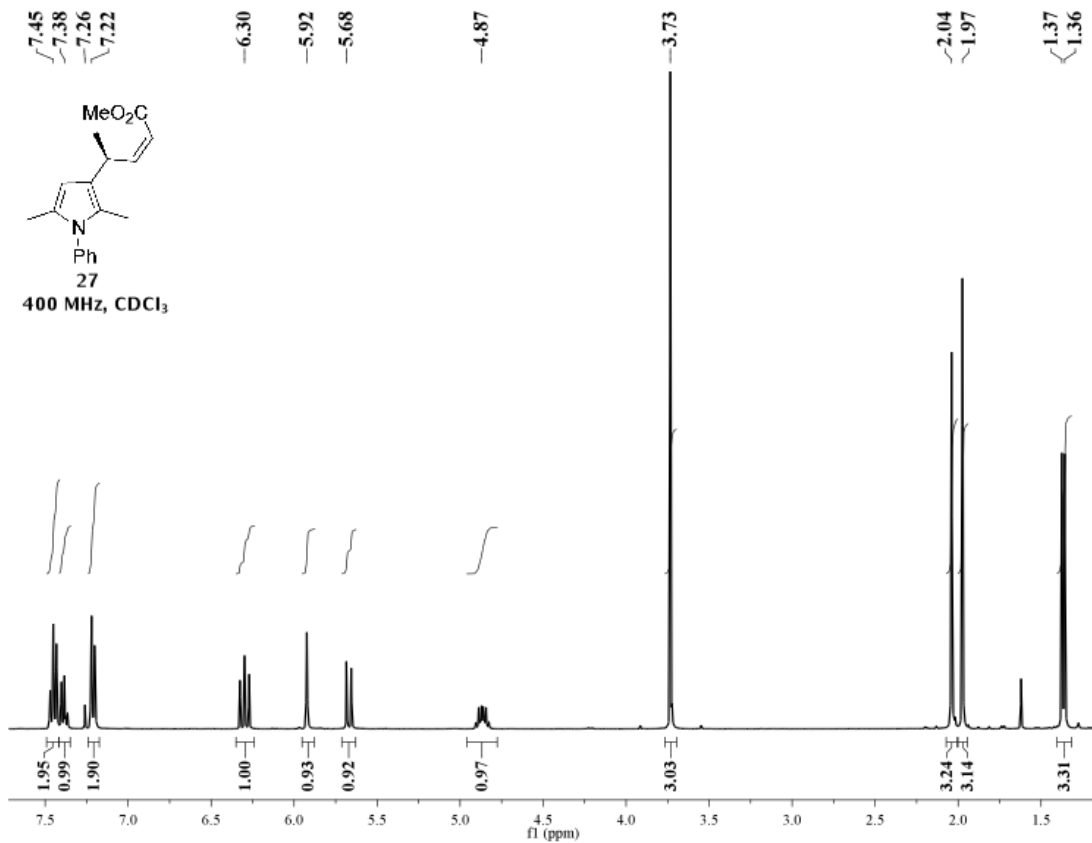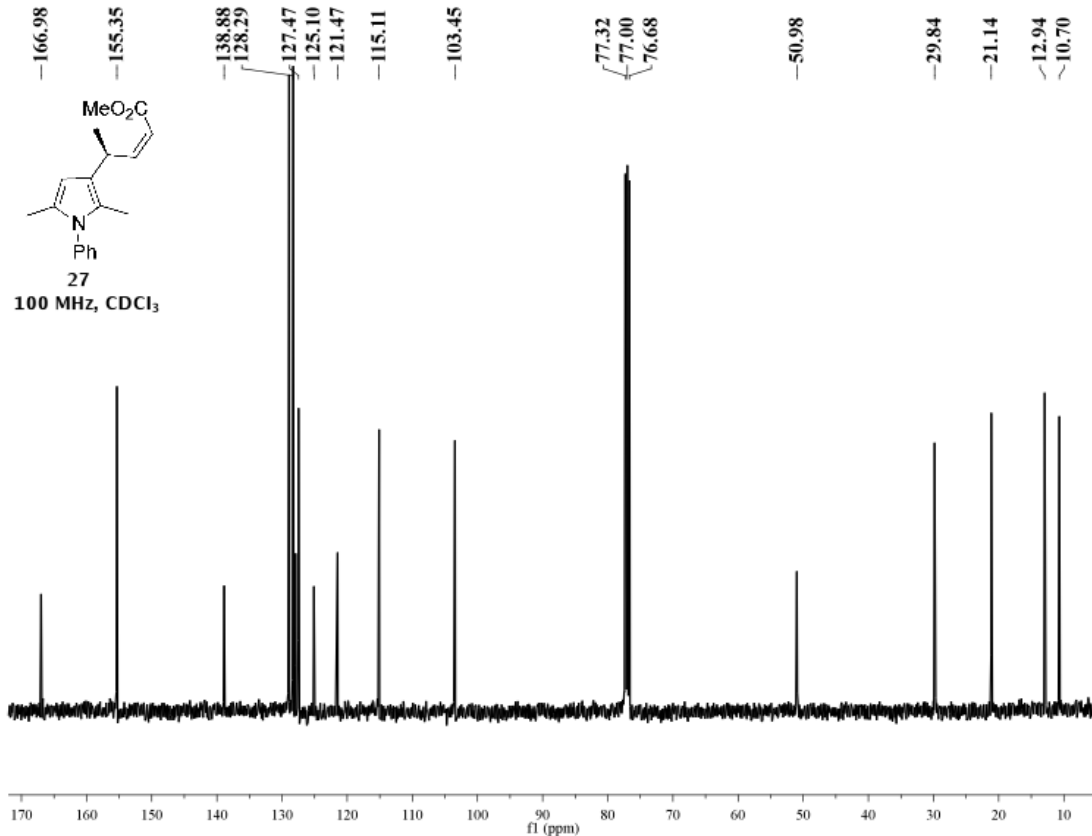

Supplement: NIHMS367002-supplement-1_si_001.pdf [file NIHMS367002-supplement-1_si_001.pdf]
